# Supplementary material for: Impact of primary health care reforms in Quebec Health Care System: a systematic literature review protocol
Source: PubMed Central journal article supplement — BMJ Open. 2023 Jul 31;13(7):e068666. doi: 10.1136/bmjopen-2022-068666 (PMC10391782; doi:10.1136/bmjopen-2022-068666), 2023-07-31
Supplement: bmjopen-2022-068666.draft_revisions.pdf [file bmjopen-2022-068666.draft_revisions.pdf]

# BMJ Open

BMJ Open is committed to open peer review. As part of this commitment we make the peer review history of every article we publish publicly available.

When an article is published we post the peer reviewers' comments and the authors' responses online. We also post the versions of the paper that were used during peer review. These are the versions that the peer review comments apply to.

The versions of the paper that follow are the versions that were submitted during the peer review process. They are not the versions of record or the final published versions. They should not be cited or distributed as the published version of this manuscript.

BMJ Open is an open access journal and the full, final, typeset and author-corrected version of record of the manuscript is available on our site with no access controls, subscription charges or pay-per-view fees (<http://bmjopen.bmj.com>).

If you have any questions on BMJ Open's open peer review process please email [info.bmjopen@bmj.com](mailto:info.bmjopen@bmj.com)

# BMJ Open

## Impact of Primary health care reforms in Quebec Health Care System: A Systematic Literature Review Protocol.

|                               |                                                                                                                                                                                                                                                                                                                                                                                                                                                                                                                                                                                                                                                                                                                                                                                                                                                                                                                  |
|-------------------------------|------------------------------------------------------------------------------------------------------------------------------------------------------------------------------------------------------------------------------------------------------------------------------------------------------------------------------------------------------------------------------------------------------------------------------------------------------------------------------------------------------------------------------------------------------------------------------------------------------------------------------------------------------------------------------------------------------------------------------------------------------------------------------------------------------------------------------------------------------------------------------------------------------------------|
| Journal:                      | <i>BMJ Open</i>                                                                                                                                                                                                                                                                                                                                                                                                                                                                                                                                                                                                                                                                                                                                                                                                                                                                                                  |
| Manuscript ID                 | bmjopen-2022-068666                                                                                                                                                                                                                                                                                                                                                                                                                                                                                                                                                                                                                                                                                                                                                                                                                                                                                              |
| Article Type:                 | Protocol                                                                                                                                                                                                                                                                                                                                                                                                                                                                                                                                                                                                                                                                                                                                                                                                                                                                                                         |
| Date Submitted by the Author: | 13-Oct-2022                                                                                                                                                                                                                                                                                                                                                                                                                                                                                                                                                                                                                                                                                                                                                                                                                                                                                                      |
| Complete List of Authors:     | Landa, Paolo; Faculté des sciences de l'administration Université Laval, Département d'opérations et systèmes de décision; Centre de recherche du CHU de Quebec-Université Laval<br>Lalonde, Jean-Denis; Faculté des sciences de l'administration Université Laval, Département d'opérations et systèmes de décision<br>Bergeron, Frédéric; Université Laval, Bibliothèque-Direction des services-conseils<br>Kassim, Said; Université Laval; Université Laval, Department of management<br>Côté, André; Université Laval, Département de management; Institut universitaire de cardiologie et de pneumologie de Québec<br>Gartner, Jean-Baptiste; Université Laval, Département de management; Centre de recherche du CHU de Quebec-Université Laval<br>Tanfani, Elena; Università degli Studi di Genova, Dipartimento di Economia<br>Resta, Marina; Università degli Studi di Genova, Dipartimento di Economia |
| Keywords:                     | PRIMARY CARE, Health policy < HEALTH SERVICES ADMINISTRATION & MANAGEMENT, HEALTH SERVICES ADMINISTRATION & MANAGEMENT, Organisation of health services < HEALTH SERVICES ADMINISTRATION & MANAGEMENT, Protocols & guidelines < HEALTH SERVICES ADMINISTRATION & MANAGEMENT, PUBLIC HEALTH                                                                                                                                                                                                                                                                                                                                                                                                                                                                                                                                                                                                                       |
|                               |                                                                                                                                                                                                                                                                                                                                                                                                                                                                                                                                                                                                                                                                                                                                                                                                                                                                                                                  |

SCHOLARONE™  
Manuscripts

1  
2  
3  
4  
5  
6  
7  
8  
9  
10  
11  
12  
13  
14  
15  
16  
17  
18  
19  
20  
21  
22  
23  
24  
25  
26  
27  
28  
29  
30  
31  
32  
33  
34  
35  
36  
37  
38  
39  
40  
41  
42  
43  
44  
45  
46  
47  
48  
49  
50  
51  
52  
53  
54  
55  
56  
57  
58  
59  
60

# 1     **Impact of Primary health care reforms in Quebec Health Care System:** 2                                   **A Systematic Literature Review Protocol.**

3  
4     Paolo Landa<sup>1,2\*</sup>, Jean-Denis Lalonde<sup>1</sup>, Frédéric Bergeron<sup>3</sup>, Kassim Said Abasse<sup>2,4,6,7</sup>,  
5     André Côté<sup>4,2,7,8</sup>, Jean-Baptiste Gartner<sup>4,2,6,7,8</sup>, Elena Tànfani<sup>5</sup>, Marina Resta<sup>5</sup>

6     <sup>1</sup>Département d'opérations et systèmes de décision, Faculté des sciences de  
7     l'administration Université Laval, Québec, G1V 0A6, Canada.

8     <sup>2</sup>Centre de recherche du CHU de Québec, Université Laval, Québec, G1V 0A6, Canada

9     <sup>3</sup>Bibliothèque, Direction des services-conseils, Université Laval, Québec, G1V 0A6,  
10     Canada

11     <sup>4</sup>Département de management, Faculté des sciences de l'administration, Université Laval,  
12     Québec, G1V 0A6, Canada.

13     <sup>5</sup>Dipartimento di Economia, Università degli studi di Genova, Genova, 16126, Italy.

14     <sup>6</sup>Centre de recherche en gestion des services de santé, Université Laval, Québec, G1V 0A6,  
15     Canada.

16     <sup>7</sup>VITAM, Centre de recherche en santé durable, Université Laval, Québec, G1V 0A6,  
17     Canada.

18     <sup>8</sup>Centre de recherche du CISSS de Chaudière-Appalaches, Québec, G1V 0A6, Canada.

## 21     **\*Corresponding Author**

22     Paolo Landa, Ph.D

23     Professeur Adjoint

24     Département d'opérations et systèmes de décision

25     Faculté des sciences de l'administration

26     Université Laval, Québec, QC, G1V 0A6, Canada

27     Local 2421, Tel :(+1)418-656-2131 (Ext. 413389)

28     Email: [Paolo.Landa@fsa.ulaval.ca](mailto:Paolo.Landa@fsa.ulaval.ca).

1  
2  
3 **30 Abstract**

4  
5 **31 Introduction:** During the last decade the Quebec Public Health Care System (QPHS) had  
6  
7 **32** important transformation in primary care planning activity. The increase of the service  
8  
9 **33** demand together with a significative reduction of supply in primary care may be at risk of  
10  
11 **34** reducing access to health care services, with a negative impact on health outcomes. The  
12  
13 **35** aims of this systematic literature review are to map and aggregate existing literature and  
14  
15 **36** evidence on the primary care provided in Quebec, showing the benefits and limitations  
16  
17 **37** associated with the health policies, and highlighting areas of improvement.

18  
19 **38 Methods and Analysis:** PubMed, EMBASE, Web of Science, and CINAHL will be  
20  
21 **39** searched for articles and government reports between January 2000 and January 2022 using  
22  
23 **40** a pre-specified search strategy. The review will be performed in accordance with the  
24  
25 **41** framework suggested by PRISMA. A wide range of electronic databases and grey literature  
26  
27 **42** sources will be systematically searched using predefined keywords. The review will  
28  
29 **43** include any study design, with the exclusion of protocols, with a focus on the analysis of  
30  
31 **44** health care policies, outcomes, costs and management of the primary health care services,  
32  
33 **45** published in either English or French languages. Two reviewers will independently screen  
34  
35 **46** titles, abstracts, full-text articles and select studies meeting the inclusion criteria. A  
36  
37 **47** customised data extraction form will be used to extract data from the included studies.  
38  
39 **48** Results will be presented in tabular format developed iteratively by the research team.

40  
41 **49 Ethics and dissemination:** Research ethics approval is not required as exclusively  
42  
43 **50** secondary data will be used. Review findings will be used to advance understanding about  
44  
45 **51** primary care in QPHS, its characteristics, and the policies. The review will develop  
46  
47 **52** recommendations on possible improvements in health care policies to provide equal access  
48  
49 **53** to the population. Findings will be disseminated in peer-reviewed journals, presentations  
50  
51 **54** and through discussions with stakeholders.

52  
53  
54  
55  
56  
57 **56 Keywords:** Primary care, health care policies, Primary care management, primary care  
58  
59 **57** access, systematic literature review  
60

1  
2  
3 58 **Strengths and limitations of this study**  
4

- 5 59 ❖ This is the first study that provide a comprehensive view and analysis of the primary  
6 care in Quebec Public Health Care System and its impact on costs, outcomes and  
7 60 health organisation.  
8 61  
9  
10 62 ❖ This systematic literature review will provide a deeper understanding of the  
11 characteristics of the impact of last two decades of Quebec Public Health Care  
12 63 System policies and it will provide a synthesis of the existing evidence about  
13 64 Quebec primary care services.  
14 65  
15 66 ❖ The systematic literature review will consider only studies published from 2000  
16 onwards.  
17 67  
18 68 ❖ Findings from this review will be used to provide an insight of the primary care in  
19 Quebec and recommendations about how to improve the primary care of Quebec  
20 69 Public Health Care System.  
21 70  
22 71 ❖ Grey literature will be considered in this review. Studies will be considered and  
23 limited to those published in French and English languages.  
24 72  
25 73  
26 74  
27 75  
28  
29  
30  
31  
32  
33  
34  
35  
36  
37  
38  
39  
40  
41  
42  
43  
44  
45  
46  
47  
48  
49  
50  
51  
52  
53  
54  
55  
56  
57  
58  
59  
60

## 76 BACKGROUND

77 Primary health care services represent an important element in public health care systems.  
78 As reported by the World Health Organization "*Primary Health Care (PHC) is a whole-*  
79 *of-society approach to health that aims at ensuring the highest possible level of health and*  
80 *well-being and their equitable distribution by focusing on people's needs and as early as*  
81 *possible along the continuum from health promotion and disease prevention to treatment,*  
82 *rehabilitation and palliative care, and as close as feasible to people's everyday*  
83 *environment*"[1].

84 PHC is the most inclusive, equitable, cost-effective, and efficient approach to enhance  
85 people's physical and mental health, as well as social well-being. A strong primary health  
86 care presents lower health costs, better population health, higher patient satisfaction, fewer  
87 inappropriate and unnecessary hospital admissions, better rates of screening and early  
88 detection of chronic diseases, better patient follow-up for patients, a better management of  
89 patients with multimorbidity, and finally greater socioeconomic equity [2-8].

90 The PHC services include the general practitioners (GP) or family physicians, who  
91 represent generally the first point of contact of individuals with the health care system, and  
92 focus care on the individual within the community, delivering services across the entire  
93 spectrum of care (e.g., mental health, preventive medicine, respiratory diseases). They play  
94 an important role in health promotion and illness prevention, coordinating care with other  
95 specialties and health professionals, and advocating on behalf of their patients with respect  
96 to the care and services they need in all parts of the health care system.

97 The importance of GPs for patients is highlighted in the international literature [9-14]. The  
98 physician's personal commitment to the patient is one of the most important determinants  
99 of the patient's sense of safety, and it has a large impact on patient decision to consult a  
100 specialist or to access to an Emergency Department (ED) [15].

101

102

1  
2  
3 103 Canada has a decentralised and universal publicly funded health care system, called  
4  
5 104 Canadian Medicare, with the funding and administrations of health care primarily managed  
6  
7 105 by the thirteen Provinces and territories and the entire country. Each province has its own  
8  
9 106 insurance plan and each province receive money and assistance from federal government  
10  
11 107 on a per-capita basis. Each system is managed publicly and it is accessible to any citizen  
12  
13 108 (universally). Each provincial government is responsible for the management,  
14  
15 109 organisation, and delivery of health care services for Canadians. The insurance plans must  
16  
17 110 meet the standards of the Canadian Health Act to access to federal funds.  
18

19 112 Since 2014, Quebec's health care system has two levels of governance: the Ministerial level  
20  
21 113 with the Ministry of Health and Social Services (MSSS), and the local level with 34 health  
22  
23 114 care organisations, thirteen of which are Integrated Health and Social Services Centres  
24  
25 115 (CISSS) and nine are Integrated University Health and Social Services Centres (CIUSSS),  
26  
27 116 while only one organization between them is responsible for five specific subjects:  
28  
29 117 continuing care for short and long term patients, rehabilitation services, youth protection,  
30  
31 118 mental health, elder care with loss of autonomy [16].

32  
33 119 By the early 2000s, the Family Medicine Groups (GMF) were introduced as a new primary  
34  
35 120 care model. This was supposed to provide a small capitation payment for registering  
36  
37 121 patients and additional resources to support multidisciplinary team-based care and  
38  
39 122 continuity care. However, this new model did not reach the expected results within the  
40  
41 123 primary care organisation.

42  
43 124 In 2003, the Quebec government made important changes in the primary health care (PHC)  
44  
45 125 system. This reform included the creation of new models of PHC, Family Medicine Groups  
46  
47 126 (e.g. multidisciplinary health teams with extended opening hours and enrolment of  
48  
49 127 patients) and Network Clinics (clinics providing access to investigation and specialist  
50  
51 128 services) [17]. In 2015, Gaétan Barrette, Minister of Health and Social Services for the  
52  
53 129 Québec Government, introduced the Bill 20 law, that set a patient quota for general  
54  
55 130 practitioners. One of the Bill 20's objectives is to improve access to family medicine by  
56  
57 131 increasing the number of patients in charge for each general practitioner. The goal of this  
58  
59 132 policy is to maximize the utilisation of medical and financial resources to improve access  
60  
133 to primary care. If general practitioners failed to achieve the minimum number of patients  
134 requested from the Bill 20, then the general practitioner might have financial penalties.

1  
2  
3 135 In Quebec province in 2021 were recorded 10 660 GPs available for over a population of  
4 136 8 604 895 inhabitants, that is a GP for each 807 patients. Provided that Quebec is one of  
5 137 the largest provinces of Canada (1.668 million km<sup>2</sup>), the accessibility of PHC might  
6 138 represent an issue in terms of health policy [18]. In Nunavik and Bay St. James health  
7 139 districts (HDs) only the 3% of population has a GP, while in Montréal HD there is the  
8 140 largest part of the population without a GP (31%). Only in Chaudière-Appalaches, Bas-  
9 141 Saint-Laurent, Saguenay–Lac-Saint-Jean, and Gaspésie–Îles-de-la-Madeleine HDs the  
10 142 90% of population is assigned to a GP [19,20]. This shows us that there is a variation  
11 143 between HDs with a mean of 81.4% and a standard deviation of 26.6%. In addition, about  
12 144 the 13% of the population of Quebec has at least a chronic disease that has to be managed  
13 145 by a GP. The Provincial Government reports that there is no possible estimation of the  
14 146 waiting time once an individual is registered in the Quebec Health Care System (QHCS).  
15 147 However, as reported in newspapers the waiting time required at least to be assigned to a  
16 148 GP usually is larger than 599 days [28].  
17  
18  
19  
20  
21  
22  
23  
24  
25  
26  
27  
28  
29  
30

### 31 **Objectives**

32 152  
33 153 As equity is one of the guiding principles of the Quebec health system, our goal is to assess  
34 154 the impact of the PHC reform on equity, accessibility, costs, outcomes, and services  
35 155 provided between 2000 and 2021. In order to assess this impact, we present a systematic  
36 156 literature review that collect all the evidence together with a detailed analysis on several  
37 157 points of view.

38 158 Since the beginning of the COVID-19 pandemics, the accessibility to primary health care  
39 159 worsened, as most resources were concentrated on secondary care, and the gap between  
40 160 available resources in QHCS and the population health needs increased. The problem was  
41 161 already reported previously [21-23], but after the pandemics this problem will become  
42 162 more evident and it will represent a challenge for the government.

43 163 The aim of this work consists in studying, through this systematic literature review, the last  
44 164 two decades of the QHCS primary care and the impact of the health policies developed on  
45 165 health organisation, costs, health outcomes, accessibility, and services, considering both  
46 166 patient and QHCS perspectives.  
47  
48  
49  
50  
51  
52  
53  
54  
55  
56  
57  
58  
59  
60



1  
2  
3 1674  
5 1686  
7 169 **METHODS AND ANALYSIS**

8 170

9 171 This protocol has been prepared using the Preferred Reporting Items for Systematic  
10 172 Reviews and Meta-Analyses Protocols guidelines [24], as shown in PRISMA-P checklist  
11 173 (Supplementary material 1). Important amendments made to the protocol will be  
12 174 documented and published alongside the results of the systematic review.

15  
16 17517 176 **Research question**

18 177

19 178 This systematic literature review poses the question about a new reform for Primary care  
20 179 and GPs activities, together with a collection of evidence of the impact of the actual PHC  
21 180 organisation in Quebec, in order to assess the health care services accessibility and equity.

24  
25 18126 182 **Eligibility criteria**

27 183

28 184 The criteria for the study selection will be based on studies that will explicitly analyse the  
29 185 impact of any policy implementation or activity provided where GPs or family doctors are  
30 186 included, together with the information about corresponding health outcomes, costs, or  
31 187 performance on system organisation.

34  
35 18836 189 **Study design/characteristics**

37 190

38 191 Target studies will include Meta-Analysis, Systematic Review, Randomized Controlled  
39 192 Trial, Cohort Study (Prospective Observational Study), Case-control Study, Cross-  
40 193 sectional study, Case Reports, and Series, that show the impact of GP activities on health  
41 194 outcomes, costs, health organisation and management, services in QHCS. We will consider  
42 195 also summary papers, government and public health reports and other analyses to source  
43 196 relevant primary papers. Study protocols will not be considered in this systematic literature  
44 197 review.

50  
51 19852 199 **Information sources**

53 200

54 201 A research of academic databases including: PubMed, EMBASE, Web of Science, and  
55 202 Cumulative Index to Nursing and Allied Health Literature (CINAHL) will be performed

56  
57  
58  
59  
60

203 by an author experienced in conducting systematic reviews (FB). The search will look for  
 204 potentially relevant articles using predefined strategies (Supplementary material 2). A  
 205 manual search of the reference lists of the studies will be performed in order to check for  
 206 any additional possible relevant articles. The manual search will be based on backward  
 207 snowballing search that will involve search of the reference list of the articles selected and  
 208 identified. In addition, for some of the relevant journals will be performed a hand search to  
 209 ensure a saturation of the literature. Studies will be excluded if they do not investigate on  
 210 QHCS.

### 212 **Search strategy**

214 The search strategy (Table 1) will be reviewed by the first (PL) and the second (JDL)  
 215 reviewer, together with the supervision of the third reviewer (KSA). The search strategy  
 216 will have filters limiting studies to 2000 onwards, studies published in English or French.  
 217 The time limitation is chosen as by the early 2000s, the Family Medicine Groups (GMF)  
 218 were introduced as a new primary care model. The literature review searches will be  
 219 updated at the end of the search process. In addition, using the Population, Intervention,  
 220 Comparison, Outcome, Timing and Study design (PICOTS) strategy [25,26], we  
 221 elaborated the guiding question of this review to ensure the systematic search of available  
 222 literature: “What is the impact of last two decades of primary health care reform for GP  
 223 activities on health outcomes, costs, equity and accessibility for Quebec adult population?”.

| PICOS strategy   | Inclusion criteria                                               | Exclusion criteria                                                                            |
|------------------|------------------------------------------------------------------|-----------------------------------------------------------------------------------------------|
| P – Population   | Primary health care reform/setting/practice/activities in Quebec | Infants and adolescents treated in Quebec province and adults treated outside Quebec province |
| I – Intervention | Any health care treatment                                        |                                                                                               |
| C – Comparison   | No comparator                                                    |                                                                                               |
| O – Outcomes     | Health service accessibility and equity                          |                                                                                               |

|                  |                                                                                                                                                                                    |                                    |
|------------------|------------------------------------------------------------------------------------------------------------------------------------------------------------------------------------|------------------------------------|
| T - Timing       | Studies from 2000 onwards                                                                                                                                                          | Studies published before year 2000 |
| S – Study design | Meta-Analysis, Systematic Review, Randomized Controlled Trial, Cohort Study (Prospective Observational Study), Case-control Study, Cross-sectional study, Case Reports and Series, | Protocols                          |

225 Table 1 - Inclusion and exclusion criteria

226

### 227 **Screening and data collection**

228

229 The abstracts and full-text articles retrieved from the search strategy will be undertaken  
 230 using Covidence® ([www.covidence.org](http://www.covidence.org)) [27], an online systematic review tool  
 231 recommended by the Cochrane Collaboration, and duplicates will be removed. Two review  
 232 authors (PL and JDL) will independently assess titles and abstracts of records, and exclude  
 233 articles that will not meet eligibility criteria. Disagreements between the selected papers  
 234 made by the two review authors will be resolved by discussion or by a third review author  
 235 (KSA or JBG).

236

237

### 238 **Quality assessment**

239

240

241 Two independent reviewers (PL, JDL) will assess the methodological quality of eligible  
 242 studies. Two independent reviewers will score the selected studies and disagreements will  
 243 be resolved by a third reviewer (KSA or JBG).

244

### 245 **Data extraction and synthesis**

246

247 Two review authors will independently extract and record data from included studies using  
 248 a predefined data extraction form. The reviewers will pilot the data extraction form with a  
 249 sample of a limited number of papers (10) and amendments will be made as necessary.

250

251

252

253

254

255

256

257

1  
2  
3 250 After the evaluation of piloting, the data extraction will be developed and completed using  
4  
5 251 Covidence®. The data extraction form will include the following information: study  
6  
7 252 reference, project name, country, year, study design, participant information, accessibility,  
8  
9 253 equity, health outcomes (such as QALYs), costs (direct and indirect), clinical area of  
10  
11 254 interest of the study, role of the GP in the study, GPs activities. Other additional  
12  
13 255 information will be included during the review process. If additional information will be  
14  
15 256 required from the studies, the reviewers will contact study authors. At the end of data  
16  
17 257 extraction, two reviewers will resolve any discrepancies that will be present applying a  
18  
19 258 consensus-based decision, or if necessary, discussion with a third reviewer.

20  
21 259 Data synthesis will be undertaken through a narrative approach, providing detailed written  
22  
23 260 commentary on the data extracted previously. This will help in the understanding of the  
24  
25 261 impact of GPs activity to the delivery of care and the related issues. In addition, summary  
26  
27 262 tables will be used to present data in a structured format.

### 263 264 **Cumulative evidence**

265  
266 266 We will use the GRADE approach to assess the certainty of the evidence for each outcome,  
27  
28 267 and present data ‘Summary of Findings’ tables [29].  
29  
30  
31  
32  
33 268

### 34 269 **Conclusion**

35 270  
36 271 Our results will include information about the impact of the public health reforms on costs,  
37  
38 272 key outcomes (such as mortality, HRQOL and adverse events), health resources utilisation,  
39  
40 273 health service delivery, accessibility and equity. Therefore, it may help in supporting  
41  
42 274 decision-making for Quebec Government to improve the QPHC system, especially for GPs  
43  
44 275 activity and patient quality of care. We will also identify gaps in the evidence which will  
45  
46 276 inform suggestions for future research priorities.

47 277

### 48 278 **Patient and public involvement**

49 279  
50 280 Patients were not directly involved in the design of this study. As this is a protocol for a  
51  
52 281 systematic review and no participant recruitment will take place, their involvement on the  
53  
54 282 recruitment and dissemination of findings to participants was not applicable.  
55  
56 283

## 284 **ETHICS AND DISSEMINATION**

285

286 To our knowledge, this systematic review will be the first to synthesise the available  
287 evidence on the impact of PHC reforms on health care organisation in Quebec evaluating  
288 several dimensions (e.g. costs, health outcomes, services accessibility, equity). The results  
289 of this review will also inform policy-makers and leaders of Quebec Public health in  
290 developing appropriate reforms to improve the PHC organization. Our results may  
291 highlight gaps in knowledge and guide future research concerned with the PHC  
292 organization.

293 This study does not require the ethical review as it is a systematic literature review. The  
294 objective is submitting this work and the future development to a peer-reviewed journal  
295 and presenting the main findings at Quebec government, national and international  
296 meetings and conferences.

297

298

299 **Contributors:** PL, JDL led the design, search strategy and conceptualisation of this work  
300 and drafted the protocol. FB performed the search strategy and provided the corresponding  
301 results. PL, JDL, MR, KSA, ET, AC, JBG were involved in the conceptualisation of the  
302 review design, inclusion and exclusion criteria and provided feedback on the methodology  
303 and the manuscript. PL, MR, ET, AC, JBG and JDL were involved in data extraction forms.  
304 All authors provided feedback on the manuscript and approval to the publishing of this  
305 protocol manuscript.

306

307 **Funding:** Université Laval - Fonds de démarrage Université Laval (Canada). Soutien à la  
308 recherche (SAR) Faculté des Sciences de l'administration - Volet 1A : Démarrage nouveau  
309 professeur adjoint (DC132416)

310

311 **Competing interests:** The authors declare no potential conflict of interest

312

313 **Patient consent:** Not required.

314

315 **Ethics approval:** Research ethics approval is not required for a systematic literature  
316 review.

317

318 **Provenance and peer review:** Not commissioned; externally peer reviewed.

319

320

321

322

## 323 **REFERENCES**

324

- 1  
2  
3 325 1. World Health Organization & United Nations Children's Fund (UNICEF). (2018).  
4 326 A vision for primary health care in the 21st century: towards universal health  
5 327 coverage and the Sustainable Development Goals. World Health Organization.  
6 328 <https://apps.who.int/iris/handle/10665/328065>. Licence: CC BY-NC-SA 3.0 IGO
- 7  
8 329 2. Starfield B, Shi L, Macinko J. Contribution of primary care to health systems and  
9 330 health. *Milbank Q* 2005;83:457-502.
- 10 331 3. Macinko J, Starfield B, Shi L. The contribution of primary care systems to health  
11 332 outcomes within Organization for Economic Cooperation and Development  
12 333 (OECD) countries, 1970–1998. *Health Serv Res* 2003;38:831-65.
- 13 334 4. Adashi E.Y., Geiger H.J., Fine M.D. - Health Care Reform and Primary Care —  
14 335 The Growing Importance of the Community Health Center. *New England Journal*  
15 336 *of Medicine* 2010; 362(22) 2047-2050
- 16 337 5. Wright J, Williams R, Wilkinson J R. Development and importance of health needs  
17 338 assessment *BMJ* 1998; 316 :1310 doi:10.1136/bmj.316.7140.1310.
- 18 339 6. Murante A.M., Seghieri C., Vainieri M., Schäfer W.L.A. - Patient-perceived  
19 340 responsiveness of primary care systems across Europe and the relationship with the  
20 341 health expenditure and remuneration systems of primary care doctors. *Social*  
21 342 *Science & Medicine* 2017, 186 139-147, ISSN 0277-9536,  
22 343 <https://doi.org/10.1016/j.socscimed.2017.06.005>.
- 23 344 7. Stange KC, Ferrer RL. The paradox of primary care. *Ann Fam Med* 2009;7:293-9.
- 24 345 8. van Weel, C., Kidd, M.R. (2018) Why strengthening primary health care is essential  
25 346 to achieving universal health coverage. *Canadian Medical Association Journal*,  
26 347 190(15) E463-E466, DOI: 10.1503/cmaj.170784
- 27 348 9. Wilson, T., Roland, M., & Ham, C. (2006). The contribution of general practice  
28 349 and the general practitioner to NHS patients. *Journal of the Royal Society of*  
29 350 *Medicine*, 99(1), 24–28. <https://doi.org/10.1258/jrsm.99.1.24>
- 30 351 10. Kang, M., Robards, F., Luscombe, G. et al. The relationship between having a  
31 352 regular general practitioner (GP) and the experience of healthcare barriers: a cross-  
32 353 sectional study among young people in NSW, Australia, with oversampling from  
33 354 marginalised groups. *BMC Fam Pract* 21, 220 (2020).  
34 355 <https://doi.org/10.1186/s12875-020-01294-8>
- 35 356 11. Hoffmann K, Stein KV, Maier M, et al. Access points to the different levels of  
36 357 health care and demographic predictors in a country without a gatekeeping system.  
37 358 Results of a cross-sectional study from Austria. *Eur J Pub Health*. 2013;23(6):933–  
38 359 9.
- 39 360 12. Pereira Gray DJ, Sidaway-Lee K, White E, et al. Continuity of care with doctors—a  
40 361 matter of life and death? A systematic review of continuity of care and mortality.  
41 362 *BMJ Open*. 2018;8:e021161. <https://doi.org/10.1136/bmjopen-2017-021161>.
- 42 363 13. Philips H, Verhoeve V, Morree SI, et al. . Information campaigns and trained  
43 364 triagists may support patients in making an appropriate choice between GP and  
44 365 emergency department. *Eur J Gen Pract*. 2019;25(4):243-244.
- 45 366 14. Henninger S, Spencer B, Pasche O. Deciding whether to consult the GP or an  
46 367 emergency department: a qualitative study of patient reasoning in Switzerland. *Eur*  
47 368 *J Gen Pract*. 2019;25(3):136–142.
- 48 369 15. Henninger, S., Spencer, B., & Pasche, O. (2019). Importance of the GP-patient  
49 370 relationship. *The European journal of general practice*, 25(4), 245.  
50 371 <https://doi.org/10.1080/13814788.2019.1679469>

1  
2  
3  
4  
5  
6  
7  
8  
9  
10  
11  
12  
13  
14  
15  
16  
17  
18  
19  
20  
21  
22  
23  
24  
25  
26  
27  
28  
29  
30  
31  
32  
33  
34  
35  
36  
37  
38  
39  
40  
41  
42  
43  
44  
45  
46  
47  
48  
49  
50  
51  
52  
53  
54  
55  
56  
57  
58  
59  
60

- 372 16. Gouvernement du Québec, 2017 Le système de santé et de services sociaux au  
373 Québec En bref. La direction des communications du ministère de la Santé et des  
374 Services sociaux du Québec. Available at  
375 <https://publications.msss.gouv.qc.ca/msss/fichiers/2017/17-731-01WF.pdf>  
376 17. Breton, M., Levesque, J., Pineault, R. & Hogg, W. (2011). L'implantation du  
377 modèle des groupes de médecine de famille au Québec : potentiel et limites pour  
378 l'accroissement de la performance des soins de santé primaires. *Pratiques et*  
379 *Organisation des Soins*, 42, 101-109. <https://doi.org/10.3917/pos.422.0101>  
380 18. Collège des médecins du Québec - Répartition des médecins selon les certificats de  
381 spécialité <http://www.cmq.org/statistiques/specialite.aspx>  
382 19. Banque de données des statistiques officielles sur le Québec - Proportion de la  
383 population inscrite auprès d'un médecin de famille, selon la région socio-sanitaire  
384 (RSS) de résidence et le sexe, 2013 à 2020 <https://bdso.gouv.qc.ca/>  
385 20. Simard, M., Dubé M., Gaulin M., Trépanier P., Bureau d'information et d'études  
386 en santé des populations, Institut national de santé publique du Québec, Sirois C..  
387 La prévalence de la multimorbidité au Québec : portrait pour l'année 2016-2017  
388 [Online]. Québec (Qc). INSPQ (Institut national de la santé publique du Québec.  
389 2019 [consulted on march 20th, 2022]  
390 [https://www.inspq.qc.ca/sites/default/files/publications/2577\\_prevalence\\_multimo](https://www.inspq.qc.ca/sites/default/files/publications/2577_prevalence_multimo)  
391 [rbidite quebec 2016 2017.pdf](https://www.inspq.qc.ca/sites/default/files/publications/2577_prevalence_multimo)  
392 21. Gladu F. P. (2007). Perceived shortage of family doctors in Quebec: can we do  
393 something about it?. *Canadian family physician Medecin de famille canadien*,  
394 53(11), 1858–1873.  
395 22. Maude Laberge, Myriam Gaudreault (2019) Promoting access to family medicine  
396 in Québec, Canada: Analysis of bill 20, enacted in November 2015, Health Policy,  
397 Volume 123, Issue 10, 2019, Pages 901-905, ISSN 0168-8510,  
398 <https://doi.org/10.1016/j.healthpol.2019.08.003>.  
399 23. Lee G, Quesnel-Vallée A. 2019. Improving Access to Family Medicine in Québec  
400 through Quotas and Numerical Targets. *Health Reform Observer - Observatoire*  
401 *des Réformes de Santé* 7 (4): Article 2. DOI: [https://doi.org/10.13162/hro-](https://doi.org/10.13162/hro-ors.v7i4.3866)  
402 [ors.v7i4.3866](https://doi.org/10.13162/hro-ors.v7i4.3866)  
403 24. Shamseer L, Moher D, Clarke M, Ghersi D, Liberati A, Petticrew M et al. Preferred  
404 reporting items for systematic review and meta-analysis protocols (PRISMA-P)  
405 2015: elaboration and explanation *BMJ* 2015; 349 :g7647 doi:10.1136/bmj.g7647  
406 25. Riva JJ, Malik KM, Burnie SJ, Endicott AR, Busse JW. What is your research  
407 question? An introduction to the PICOT format for clinicians. *Journal of Canadian*  
408 *Chiropractic Association*. 2012;56(3):167-171.  
409 26. The Cochrane Collaboration. Chapter 5: Defining the review question and  
410 developing criteria for including studies. In: Higgins JPT, Green S, eds. *Cochrane*  
411 *handbook of systematic reviews*. Version 5.0.1: The Cochrane Collaboration, 2008.  
412 27. Covidence systematic review software, Veritas Health Innovation, Melbourne,  
413 Australia. Available at [www.covidence.org](http://www.covidence.org)  
414 28. Patrick Bellerose, 599 jours d'attente pour avoir son médecin de famille au Québec.  
415 August 2<sup>nd</sup>, 2021. Accessed on May 13<sup>th</sup>, 2022  
416 [https://www.tvanouvelles.ca/2021/08/02/599-jours-dattente-pour-avoir-son-](https://www.tvanouvelles.ca/2021/08/02/599-jours-dattente-pour-avoir-son-medecin-de-famille-au-quebec)  
417 [medecin-de-famille-au-quebec](https://www.tvanouvelles.ca/2021/08/02/599-jours-dattente-pour-avoir-son-medecin-de-famille-au-quebec)

- 1  
2  
3 418 29. Atkins D., Eccles M., Flottorp S., Guyatt G.H., Henry D., Hill S., Liberati A.,  
4 419 O'Connell D., Oxman A.D., Phillips B., Schünemann H., Tan-Torres Edejer T., Vist  
5 420 G.E., Williams Jr J.W., and The GRADE Working Group. Systems for grading the  
6 421 quality of evidence and the strength of recommendations I: Critical appraisal of  
7 422 existing approaches The GRADE Working Group. BMC Health Serv Res 4, 38  
8 423 (2004). <https://doi.org/10.1186/1472-6963-4-38>  
9 424  
10 425  
11 426  
12  
13  
14  
15  
16  
17  
18  
19  
20  
21  
22  
23  
24  
25  
26  
27  
28  
29  
30  
31  
32  
33  
34  
35  
36  
37  
38  
39  
40  
41  
42  
43  
44  
45  
46  
47  
48  
49  
50  
51  
52  
53  
54  
55  
56  
57  
58  
59  
60



**PRISMA-P (Preferred Reporting Items for Systematic review and Meta-Analysis Protocols) 2015 checklist: recommended items to address in a systematic review protocol\***

| Section and topic                 | Item No | Checklist item                                                                                                                                                                                                                | Yes/No | Line               | Description                |
|-----------------------------------|---------|-------------------------------------------------------------------------------------------------------------------------------------------------------------------------------------------------------------------------------|--------|--------------------|----------------------------|
| <b>ADMINISTRATIVE INFORMATION</b> |         |                                                                                                                                                                                                                               |        |                    |                            |
| Title:                            |         |                                                                                                                                                                                                                               |        |                    |                            |
| Identification                    | 1a      | Identify the report as a protocol of a systematic review                                                                                                                                                                      | Yes    | 1-2                |                            |
| Update                            | 1b      | If the protocol is for an update of a previous systematic review, identify as such (No)                                                                                                                                       | N.A.   |                    | Not applicable             |
| Registration                      | 2       | If registered, provide the name of the registry (such as PROSPERO) and registration number                                                                                                                                    | N.A.   |                    | Not registered on PROSPERO |
| Authors:                          |         |                                                                                                                                                                                                                               |        |                    |                            |
| Contact                           | 3a      | Provide name, institutional affiliation, e-mail address of all protocol authors; provide physical mailing address of corresponding author                                                                                     | Yes    | 6-18               |                            |
| Contributions                     | 3b      | Describe contributions of protocol authors and identify the guarantor of the review                                                                                                                                           | Yes    | 300-307            |                            |
| Amendments                        | 4       | If the protocol represents an amendment of a previously completed or published protocol, identify as such and list changes; otherwise, state plan for documenting important protocol amendments                               | N.A.   |                    | Not applicable             |
| Support:                          |         |                                                                                                                                                                                                                               |        |                    |                            |
| Sources                           | 5a      | Indicate sources of financial or other support for the review                                                                                                                                                                 | Yes    | 309-311            |                            |
| Sponsor                           | 5b      | Provide name for the review funder and/or sponsor                                                                                                                                                                             | Yes    | 309-311            |                            |
| Role of sponsor or funder         | 5c      | Describe roles of funder(s), sponsor(s), and/or institution(s), if any, in developing the protocol                                                                                                                            | N.A.   |                    | Not applicable             |
| <b>INTRODUCTION</b>               |         |                                                                                                                                                                                                                               |        |                    |                            |
| Rationale                         | 6       | Describe the rationale for the review in the context of what is already known                                                                                                                                                 | Yes    | 157-170            |                            |
| Objectives                        | 7       | Provide an explicit statement of the question(s) the review will address with reference to participants, interventions, comparators, and outcomes (PICO)                                                                      | Yes    | 217-229            |                            |
| <b>METHODS</b>                    |         |                                                                                                                                                                                                                               |        |                    |                            |
| Eligibility criteria              | 8       | Specify the study characteristics (such as PICO, study design, setting, time frame) and report characteristics (such as years considered, language, publication status) to be used as criteria for eligibility for the review | Yes    | 217-229            |                            |
| Information sources               | 9       | Describe all intended information sources (such as electronic databases, contact with study authors, trial registers or other grey literature sources) with planned dates of coverage                                         | Yes    | 205-213<br>217-221 |                            |
| Search strategy                   | 10      | Present draft of search strategy to be used for at least one electronic database, including planned                                                                                                                           | Yes    |                    | Supplementary material     |

| limits, such that it could be repeated |     |                                                                                                                                                                                                                                                  |      |                        |
|----------------------------------------|-----|--------------------------------------------------------------------------------------------------------------------------------------------------------------------------------------------------------------------------------------------------|------|------------------------|
| Study records:                         |     |                                                                                                                                                                                                                                                  |      |                        |
| Data management                        | 11a | Describe the mechanism(s) that will be used to manage records and data throughout the review                                                                                                                                                     | Yes  | 232-246                |
| Selection process                      | 11b | State the process that will be used for selecting studies (such as two independent reviewers) through each phase of the review (that is, screening, eligibility and inclusion in meta-analysis)                                                  | Yes  | 232-246                |
| Data collection process                | 11c | Describe planned method of extracting data from reports (such as piloting forms, done independently, in duplicate), any processes for obtaining and confirming data from investigators                                                           | Yes  | 250-265                |
| Data items                             | 12  | List and define all variables for which data will be sought (such as PICO items, funding sources), any pre-planned data assumptions and simplifications                                                                                          | Yes  | 250-265                |
| Outcomes and prioritization            | 13  | List and define all outcomes for which data will be sought, including prioritization of main and additional outcomes, with rationale                                                                                                             | Yes  | 255-256                |
| Risk of bias in individual studies     | 14  | Describe anticipated methods for assessing risk of bias of individual studies, including whether this will be done at the outcome or study level, or both; state how this information will be used in data synthesis                             | N.A. | Not applicable         |
| Data synthesis                         | 15a | Describe criteria under which study data will be quantitatively synthesised                                                                                                                                                                      | Yes  | 262-265                |
|                                        | 15b | If data are appropriate for quantitative synthesis, describe planned summary measures, methods of handling data and methods of combining data from studies, including any planned exploration of consistency (such as $I^2$ , Kendall's $\tau$ ) | N.A. | Not applicable         |
|                                        | 15c | Describe any proposed additional analyses (such as sensitivity or subgroup analyses, meta-regression)                                                                                                                                            | N.A. | Not applicable         |
|                                        | 15d | If quantitative synthesis is not appropriate, describe the type of summary planned                                                                                                                                                               | N.A. |                        |
| Meta-bias(es)                          | 16  | Specify any planned assessment of meta-bias(es) (such as publication bias across studies, selective reporting within studies)                                                                                                                    | N.A. | Not applicable         |
| Confidence in cumulative evidence      | 17  | Describe how the strength of the body of evidence will be assessed (such as GRADE)                                                                                                                                                               | Yes  | 269-270 Not applicable |

**\* It is strongly recommended that this checklist be read in conjunction with the PRISMA-P Explanation and Elaboration (cite when available) for important clarification on the items. Amendments to a review protocol should be tracked and dated. The copyright for PRISMA-P (including checklist) is held by the PRISMA-P Group and is distributed under a Creative Commons Attribution Licence 4.0.**

*From: Shamseer L, Moher D, Clarke M, Ghersi D, Liberati A, Petticrew M, Shekelle P, Stewart L, PRISMA-P Group. Preferred reporting items for systematic review and meta-analysis protocols (PRISMA-P) 2015: elaboration and explanation. BMJ. 2015 Jan 2;349(jan02 1):g7647.*

## Supplementary materials – Database search strategy

PubMed

Date of the search: 10-01-2022

Database limit: No database limit has been applied

| # | Search strategy                                                                                                                                                                                                                                                                                                                                                                                                                                                                                                                                                                                                                                                                                                                      | Results |
|---|--------------------------------------------------------------------------------------------------------------------------------------------------------------------------------------------------------------------------------------------------------------------------------------------------------------------------------------------------------------------------------------------------------------------------------------------------------------------------------------------------------------------------------------------------------------------------------------------------------------------------------------------------------------------------------------------------------------------------------------|---------|
| 1 | "Primary Health Care"[Mesh:NoExp] OR Primary Care[TIAB] OR Primary Healthcare[TIAB] OR Primary Health Care[TIAB] OR "Physicians, Family"[Mesh] OR Family Physician*[TIAB] OR Family Practi*[TIAB] OR "General Practitioners"[Mesh] OR "General Practice"[Mesh] OR General Practi*[TIAB]                                                                                                                                                                                                                                                                                                                                                                                                                                              |         |
| 2 | "Health Services Needs and Demand"[Mesh] OR "Health Services Accessibility"[Mesh:NoExp] OR "Delivery of Health Care"[Mesh:NoExp] OR "Health Care Reform"[Mesh] OR "Health Policy"[Mesh:NoExp] OR "Appointments and Schedules"[Mesh:NoExp] OR OR "Mass Screening/organization and administration"[Mesh:NoExp] OR Outcome and Process Assessment, Health Care[Mesh] OR Quality Indicators, Health Care[Mesh:NoExp] OR Waiting Lists[Mesh] OR Health Polic*[TIAB] OR Healthcare Polic*[TIAB] OR National Polic*[TIAB] OR Healthcare Delivery[TIAB] OR delivery of care[TIAB] OR Health access*[TIAB] OR Healthcare access*[TIAB] OR Health Care Reform*[TIAB] OR primary care demand[TIAB] OR Health demand[TIAB] OR care demande[TIAB] |         |
| 3 | "Quebec"[Mesh] OR Quebec[TIAB]                                                                                                                                                                                                                                                                                                                                                                                                                                                                                                                                                                                                                                                                                                       |         |
| 4 | #1 AND #2 AND #3                                                                                                                                                                                                                                                                                                                                                                                                                                                                                                                                                                                                                                                                                                                     | 272     |

# BMJ Open

## Impact of Primary health care reforms in Quebec Health Care System: A Systematic Literature Review Protocol

|                                 |                                                                                                                                                                                                                                                                                                                                                                                                                                                                                                                                                                                                                                                                                                                                                                                                                                                                                                    |
|---------------------------------|----------------------------------------------------------------------------------------------------------------------------------------------------------------------------------------------------------------------------------------------------------------------------------------------------------------------------------------------------------------------------------------------------------------------------------------------------------------------------------------------------------------------------------------------------------------------------------------------------------------------------------------------------------------------------------------------------------------------------------------------------------------------------------------------------------------------------------------------------------------------------------------------------|
| Journal:                        | <i>BMJ Open</i>                                                                                                                                                                                                                                                                                                                                                                                                                                                                                                                                                                                                                                                                                                                                                                                                                                                                                    |
| Manuscript ID                   | bmjopen-2022-068666.R1                                                                                                                                                                                                                                                                                                                                                                                                                                                                                                                                                                                                                                                                                                                                                                                                                                                                             |
| Article Type:                   | Protocol                                                                                                                                                                                                                                                                                                                                                                                                                                                                                                                                                                                                                                                                                                                                                                                                                                                                                           |
| Date Submitted by the Author:   | 18-May-2023                                                                                                                                                                                                                                                                                                                                                                                                                                                                                                                                                                                                                                                                                                                                                                                                                                                                                        |
| Complete List of Authors:       | Landa, Paolo; Faculté des sciences de l'administration Université Laval, Département d'opérations et systèmes de décision; Centre de recherche du CHU de Quebec-Université Laval<br>Lalonde, Jean-Denis; Faculté des sciences de l'administration Université Laval, Département d'opérations et systèmes de décision<br>Bergeron, Frédéric; Université Laval, Bibliothèque-Direction des services-conseils<br>Kassim, Said; Université Laval, ; Department of management ,<br>Côté, André; Université Laval, Département de management; Institut universitaire de cardiologie et de pneumologie de Québec<br>Gartner, Jean-Baptiste; Université Laval, Département de management; Centre de recherche du CHU de Quebec-Université Laval<br>Tanfani, Elena; Università degli Studi di Genova, Dipartimento di Economia<br>Resta, Marina; Università degli Studi di Genova, Dipartimento di Economia |
| <b>Primary Subject Heading</b>: | Public health                                                                                                                                                                                                                                                                                                                                                                                                                                                                                                                                                                                                                                                                                                                                                                                                                                                                                      |
| Secondary Subject Heading:      | Health services research, Health policy                                                                                                                                                                                                                                                                                                                                                                                                                                                                                                                                                                                                                                                                                                                                                                                                                                                            |
| Keywords:                       | PRIMARY CARE, Health policy < HEALTH SERVICES ADMINISTRATION & MANAGEMENT, HEALTH SERVICES ADMINISTRATION & MANAGEMENT, Organisation of health services < HEALTH SERVICES ADMINISTRATION & MANAGEMENT, Protocols & guidelines < HEALTH SERVICES ADMINISTRATION & MANAGEMENT, PUBLIC HEALTH                                                                                                                                                                                                                                                                                                                                                                                                                                                                                                                                                                                                         |
|                                 |                                                                                                                                                                                                                                                                                                                                                                                                                                                                                                                                                                                                                                                                                                                                                                                                                                                                                                    |

SCHOLARONE™  
Manuscripts

1  
2  
3  
4  
5  
6  
7  
8  
9  
10  
11  
12  
13  
14  
15  
16  
17  
18  
19  
20  
21  
22  
23  
24  
25  
26  
27  
28  
29  
30  
31  
32  
33  
34  
35  
36  
37  
38  
39  
40  
41  
42  
43  
44  
45  
46  
47  
48  
49  
50  
51  
52  
53  
54  
55  
56  
57  
58  
59  
60

# 1 Impact of Primary health care reforms in Quebec Health Care System: 2 A Systematic Literature Review Protocol

3  
4 Paolo Landa<sup>1,2\*</sup>, Jean-Denis Lalonde<sup>1</sup>, Frédéric Bergeron<sup>3</sup>, Kassim Said Abasse<sup>2,4,6,7</sup>,  
5 André Côté<sup>2,4,7,8</sup>, Jean-Baptiste Gartner<sup>2,4,6,7,8</sup>, Elena Tànfani<sup>5</sup>, Marina Resta<sup>5</sup>

6 <sup>1</sup>Département d'opérations et systèmes de décision, Faculté des sciences de  
7 l'administration Université Laval, Québec, G1V 0A6, Canada.

8 <sup>2</sup>Centre de recherche du CHU de Québec, Université Laval, Québec, G1V 0A6, Canada

9 <sup>3</sup>Bibliothèque, Direction des services-conseils, Université Laval, Québec, G1V 0A6,  
10 Canada

11 <sup>4</sup>Département de management, Faculté des sciences de l'administration, Université Laval,  
12 Québec, G1V 0A6, Canada.

13 <sup>5</sup>Dipartimento di Economia, Università degli studi di Genova, Genova, 16126, Italy.

14 <sup>6</sup>Centre de recherche en gestion des services de santé, Université Laval, Québec, G1V 0A6,  
15 Canada.

16 <sup>7</sup>VITAM, Centre de recherche en santé durable, Université Laval, Québec, G1V 0A6,  
17 Canada.

18 <sup>8</sup>Centre de recherche du CISSS de Chaudière-Appalaches, Québec, G1V 0A6, Canada.

## 21 \*Corresponding Author

22 Paolo Landa, PhD.

23 Professeur Adjoint

24 Département d'opérations et systèmes de décision

25 Faculté des sciences de l'administration

26 Université Laval, Québec, QC, G1V 0A6, Canada

27 Local 2421, Tel :(+1)418-656-2131 (Ext. 413389)

28 Email: [Paolo.Landa@fsa.ulaval.ca](mailto:Paolo.Landa@fsa.ulaval.ca).

1  
2  
3 **30 Abstract**  
4

5 **31 Introduction:** During the last decade the Quebec Public Health Care System (QPHCS)  
6  
7 **32** had important transformation in primary care planning activity. The increase of the service  
8  
9 **33** demand together with a significative reduction of supply in primary care may be at risk of  
10  
11 **34** reducing access to health care services, with a negative impact on costs and health  
12  
13 **35** outcomes. The aims of this systematic literature review are to map and aggregate existing  
14  
15 **36** literature and evidence on the primary care provided in Quebec, showing the benefits and  
16  
17 **37** limitations associated with the health policies developed in the last two decades, and  
18  
19 **38** highlighting areas of improvement.

20 **39 Methods and Analysis:** PubMed, EMBASE, Web of Science, and CINAHL will be  
21  
22 **40** searched for articles and government reports between January 2000 and January 2022 using  
23  
24 **41** a pre-specified search strategy. The review will be performed in accordance with the  
25  
26 **42** framework suggested by PRISMA-P. A wide range of electronic databases and grey  
27  
28 **43** literature sources will be systematically searched using predefined keywords. The review  
29  
30 **44** will include any study design, with the exclusion of protocols, with a focus on the analysis  
31  
32 **45** of health care policies, outcomes, costs and management of the primary health care  
33  
34 **46** services, published in either English or French languages. Two authors will independently  
35  
36 **47** screen titles, abstracts, full-text articles and select studies meeting the inclusion criteria. A  
37  
38 **48** customised data extraction form will be used to extract data from the included studies.  
39  
40 **49** Results will be presented in tabular format developed iteratively by the research team.

41 **50 Ethics and dissemination:** Research ethics approval is not required as exclusively  
42  
43 **51** secondary data will be used. Review findings will synthesise the characteristics and the  
44  
45 **52** impact of the reforms of QPHCS of the last two decades. Findings will therefore be  
46  
47 **53** disseminated in peer-reviewed journals, conference presentations and through discussions  
48  
49 **54** with stakeholders.

50 **55**  
51  
52 **56 Keywords:** Primary care, health care policies, Primary care management, primary care  
53  
54 **57** access, systematic literature review.  
55  
56  
57  
58  
59  
60

1  
2  
3 58 **Strengths and limitations of this study**  
4

- 5 59 ❖ This is the first study that provide a comprehensive view and analysis of the primary  
6 care in Quebec Public Health Care System and its impact on costs, outcomes,  
7 60 accessibility, equity and health organisation.  
8 61  
9 62 ❖ This systematic literature review will provide a deeper understanding of the  
10 characteristics of the impact of last two decades of Quebec Public Health Care  
11 63 System reforms and it will provide a synthesis of the existing evidence about  
12 64 Quebec primary care services.  
13 65  
14 66 ❖ The systematic literature review will consider only studies published from 2000  
15 onwards.  
16 67  
17 68 ❖ Findings from this review will be used to provide an insight of the primary care in  
18 Quebec and recommendations about how to improve the primary care of Quebec  
19 69 Public Health Care System.  
20 70  
21 71 ❖ Grey literature will be considered in this review. Studies will be considered and  
22 limited to those published in French and English languages.  
23 72  
24 73  
25 74  
26 75  
27  
28  
29  
30  
31  
32  
33  
34  
35  
36  
37  
38  
39  
40  
41  
42  
43  
44  
45  
46  
47  
48  
49  
50  
51  
52  
53  
54  
55  
56  
57  
58  
59  
60

## 76 **BACKGROUND**

77 Primary health care services represent an important element in public health care systems.  
78 As reported by the World Health Organization "*Primary Health Care (PHC) is a whole-*  
79 *of-society approach to health that aims at ensuring the highest possible level of health and*  
80 *well-being and their equitable distribution by focusing on people's needs and as early as*  
81 *possible along the continuum from health promotion and disease prevention to treatment,*  
82 *rehabilitation and palliative care, and as close as feasible to people's everyday*  
83 *environment*"[1]. PHC is the most inclusive, equitable, cost-effective, and efficient  
84 approach to enhance people's physical and mental health, as well as social well-being. A  
85 strong primary health care presents lower health costs, better population health, higher  
86 patient satisfaction, fewer inappropriate and unnecessary hospital admissions, better rates  
87 of screening and early detection of chronic diseases, better patient follow-up for patients,  
88 a better management of patients with multimorbidity, and finally greater socioeconomic  
89 equity [2-8].

90 The PHC services include the general practitioners (GP) or family physicians, who  
91 represent generally the first point of contact of individuals with the health care system, and  
92 focus care on the individual within the community, delivering services across the entire  
93 spectrum of care (e.g., mental health, preventive medicine, respiratory diseases). They play  
94 an important role in health promotion and illness prevention, coordinating care with other  
95 specialties and health professionals, and advocating on behalf of their patients with respect  
96 to the care and services they need in all parts of the health care system. The importance of  
97 GPs for patients is highlighted in the international literature [9-14]. The physician's  
98 personal commitment to the patient is one of the most important determinants of the  
99 patient's sense of safety, and it has a large impact on patient decision to consult a specialist  
100 or to access to an Emergency Department (ED) [15].

101 Canada has a decentralised and universal publicly funded health care system with the  
102 funding and administrations of health care primarily managed by the thirteen Provinces  
103 and territories and the entire country. Each province has its own insurance plan and each  
104 province receive money and assistance from federal government on a per-capita basis. Each  
105 system is managed publicly and it is accessible to any citizen (universally). Each provincial



1  
2  
3 106 government is responsible for the management, organisation, and delivery of health care  
4 107 services for Canadians. The insurance plans developed by each province must meet the  
5 108 standards of the Canadian Health Act to access to federal funds.

6  
7  
8 109 Two reforms were introduced since the early 2000 (Family Medicine Group in 2003 and  
9 110 Bill 20 in 2015) aimed at maximising medical and financial resource use in order to  
10 111 improve the patient access in primary care [16,17]. However, actually the accessibility to  
11 112 primary care for patients still represent a public health issue in Québec (Supplementary  
12 113 material 1). In addition, since the beginning of the COVID-19 pandemics, the accessibility  
13 114 to primary health care worsened [18]. This problem was already reported previously [19-  
14 115 22] and it still represent a challenge for the government [23,28].  
15  
16  
17  
18  
19  
20  
21

22 116  
23 117 The aim of this work consists in studying, through this systematic literature review, the last  
24 118 two decades of the QPHCS primary care and the impact of the reforms developed on health  
25 119 organisation, costs, health outcomes, accessibility, equity and services, considering health  
26 120 care system perspective.  
27  
28

29 121  
30 122  
31

## 32 123 **METHODS AND ANALYSIS**

33 124  
34 125 This protocol has been prepared using the Preferred Reporting Items for Systematic  
35 126 Reviews and Meta-Analyses Protocols guidelines [24], as shown in PRISMA-P checklist  
36 127 (Supplementary material 2). Important amendments made to the protocol will be  
37 128 documented and published alongside the results of the systematic review.  
38  
39  
40  
41

### 42 129 43 130 **Research question**

44 131  
45 132 This systematic literature review will synthesise the scientific literature on interventions  
46 133 that have been developed in QPHCS, focusing on Primary care and GPs activities, together  
47 134 with a collection of the evidence for assessing health outcomes, costs, equity and  
48 135 accessibility for Quebec adult population.  
49  
50  
51

### 52 136 53 137 **Eligibility criteria**

54 138  
55  
56  
57  
58  
59  
60

1  
2  
3 139 The criteria for the study selection will be based on studies that will explicitly analyse the  
4 140 impact of any policy implementation or activity provided where GPs or family doctors are  
5 141 included, together with the information about corresponding health outcomes, costs,  
6 142 accessibility or performance on system organisation.  
7  
8  
9

10 143

#### 11 144 **Study design/characteristics**

12 145

13 146 Target studies will include Meta-Analysis, Systematic Review, Randomized Controlled  
14 147 Trial, Cohort study (Prospective Observational Study), Case-control study, Cross-sectional  
15 148 study, Case Reports, Series, Quasi-experimental design, Difference in Difference analysis,  
16 149 natural experiments, regression discontinuity design that show the impact of GP activities  
17 150 on health outcomes, costs, accessibility, health organisation and management, services in  
18 151 QPHCS. We will consider also summary papers, government and public health reports and  
19 152 other analyses to identify relevant primary papers. Study protocols will not be considered  
20 153 in this systematic literature review.  
21  
22  
23  
24  
25  
26

27 154

#### 28 155 **Information sources**

29 156

30 157 A research of academic databases including: PubMed, EMBASE, Web of Science, and  
31 158 Cumulative Index to Nursing and Allied Health Literature (CINAHL) will be performed  
32 159 by an author experienced in conducting systematic reviews (FB). The search will look for  
33 160 potentially relevant articles using predefined strategies (Supplementary material 3). A  
34 161 manual search of the reference lists of the studies will be performed in order to check for  
35 162 any additional possible relevant articles. The manual search will be based on backward  
36 163 snowballing search that will involve search of the reference list of the articles selected and  
37 164 identified. In addition, for some of the relevant journals will be performed a hand search to  
38 165 ensure a saturation of the literature. Grey literature will be included in order to explore all  
39 166 the available documentation published. Studies will be excluded if they do not investigate  
40 167 on QPHCS.  
41  
42  
43  
44  
45  
46  
47  
48  
49

50 168

#### 51 169 **Search strategy**

52 170

53  
54 171 The search strategy (Table 1) will be reviewed by the first (PL) and the second (JDL)  
55 172 author, together with the supervision of the third author that is a medical librarian able to  
56  
57  
58  
59  
60

173 provide the support and the guidance on search terms and strategies (FB). The search  
 174 strategy will combine MeSH terms and free text words such as (Primary Health Care OR  
 175 Primary Care OR Primary Healthcare OR Family Physicians OR Family Practitioner OR  
 176 General Practitioners OR General Practice AND Health Services Needs and Demand OR  
 177 Health Services Accessibility OR Delivery of Health Care OR Health Care Reform OR  
 178 Health Policy OR Appointments and Schedules OR Mass Screening/organization and  
 179 administration OR Outcome and Process Assessment, Health Care OR Quality Indicators,  
 180 Health Care OR Waiting Lists OR Health Policy OR Healthcare Policy OR National Policy  
 181 OR Healthcare Delivery OR delivery of care OR Health access OR Healthcare access OR  
 182 Health Care Reform OR primary care demand OR Health demand OR care demande AND  
 183 Quebec). The search strategy will have filters limiting studies to 2000 onwards, and studies  
 184 published in English or French. The time limitation is chosen as by the early 2000s, the  
 185 Family Medicine Groups were introduced as a new primary care model. The literature  
 186 review searches will be updated at the end of the search process. In addition, using the  
 187 Population, Intervention, Comparison, Outcome, Timing and Study design (PICOTS)  
 188 strategy [25,26], we elaborated the guiding question of this review to ensure the systematic  
 189 search of available literature: “What is the impact of last two decades of primary health  
 190 care reforms for GP activities on health outcomes, costs, equity and accessibility for  
 191 Quebec adult population?”.

192

| PICOS strategy   | Inclusion criteria                                                                                                        | Exclusion criteria                                                                            |
|------------------|---------------------------------------------------------------------------------------------------------------------------|-----------------------------------------------------------------------------------------------|
| P – Population   | Primary health care reform/setting/practice/activities in Quebec                                                          | Infants and adolescents treated in Quebec province and adults treated outside Quebec province |
| I – Intervention | Any health care treatment and activity performed by Primary Care organisations and GPs that are affected from PHC reforms | Any individual activity in Primary Care that is not related to PHC reforms                    |
| C – Comparison   | No comparator                                                                                                             |                                                                                               |

|                  |                                                                                                                                                                                                                                                                                                       |                                    |
|------------------|-------------------------------------------------------------------------------------------------------------------------------------------------------------------------------------------------------------------------------------------------------------------------------------------------------|------------------------------------|
| O – Outcomes     | Health outcomes (e.g. QALYs), costs, equity and accessibility                                                                                                                                                                                                                                         |                                    |
| T - Timing       | Studies from 2000 onwards                                                                                                                                                                                                                                                                             | Studies published before year 2000 |
| S – Study design | Meta-Analysis, Systematic Review, Randomized Controlled Trial, Cohort Study (Prospective Observational Study), Case-control Study, Cross-sectional study, Case Reports and Series, Quasi-experimental design, Difference in Difference analysis, natural experiments, regression discontinuity design | Protocols                          |

Table 1 - Inclusion and exclusion criteria

### Screening, data collection and extraction

The abstracts and full-text articles retrieved from the search strategy will be undertaken using Covidence® ([www.covidence.org](http://www.covidence.org)) [27], an online systematic review tool recommended by the Cochrane Collaboration, and duplicates will be removed. Two authors (PL,JDL) will independently assess titles and abstracts of records, and exclude articles that will not meet eligibility criteria. Disagreements between the selected papers made by the two authors will be resolved by discussion or by a third author (KSA, JBG, AC, MR or ET). Four authors will independently extract and record data from included studies using a predefined data extraction form (PL, JDL, JBG, MR).

The authors will pilot the data extraction form with a sample of a limited number of papers (10) and amendments will be made as necessary. After the evaluation of piloting, the data extraction will be developed and completed. The data extraction form will include the information reported in the Supplementary material 4. Other additional information will be included during the review process. If additional information will be required from the studies, study authors will be contacted. At the end of data extraction, four authors (PL,

1  
2  
3 211 JDL, JBG, MR) will resolve any discrepancies that will be present applying a consensus-  
4 212 based decision, or if necessary, discussion with a fifth author (AC).

5  
6 213 Data synthesis will be undertaken through a narrative approach, providing detailed written  
7  
8 214 commentary on the data extracted previously. This will help in the understanding of the  
9  
10 215 impact of GPs activity to the delivery of care and the related issues. In addition, summary  
11  
12 216 tables will be used to present data in a structured format. We will use a convergent synthesis  
13  
14 217 design to synthesise qualitative, quantitative and mixed-method results [29]. Thus, using a  
15  
16 218 thematic synthesis procedure, we will synthesise the evidence from the selected studies.

### 219 220 **Quality assessment**

221  
222  
223 Two independent authors (PL, JDL) will assess the methodological quality of eligible  
224  
225 studies. Two independent authors will score the selected studies and disagreements will  
226  
227 be resolved by a third author (KSA, JBG, AC, MR or ET). For quality assessment we will  
228  
229 use the Mixed Methods Appraisal Tool (MMAT), that is a critical appraisal tool that is  
230  
231 designed for the appraisal stage of systematic mixed studies reviews that include  
232  
233 qualitative, quantitative and mixed methods studies. It enables the appraisal of five  
234  
235 categories of methodologies such as qualitative research, randomized controlled trials, non-  
236  
237 randomized studies, quantitative descriptive studies, and mixed methods studies  
(Supplementary material 5) [30].

### 238 239 **Cumulative evidence**

240  
241 We will use the MMAT approach to assess the certainty of the evidence for each study,  
242  
243 and will present the data results on the MMAT rating tables.

### 244 245 **Discussion**

246  
247 To our knowledge, this systematic review will be the first to synthesise the available  
248  
249 evidence on the impact of the last two decades reforms on primary health care organisation  
250  
251 in Quebec evaluating several dimensions (e.g. costs, health outcomes, services  
252  
253 accessibility, equity). The results of this review will also inform policy-makers and leaders  
254  
255 of Quebec Public health. Our results may highlight gaps in knowledge and guide future  
256  
257 research concerned with the primary health care organization in Quebec.

1  
2  
3 246  
4

5 247  
6

7 248 **Patient and public involvement**

8 249

9 250 Patients were not directly involved in the design of this study. As this is a protocol for a  
10 251 systematic literature review and no participant recruitment will take place, their  
11 252 involvement on the recruitment and dissemination of findings to participants was not  
12 253 applicable.  
13  
14  
15

16 254

17 255 **ETHICS AND DISSEMINATION**

18 256

19 257 This study does not require the ethical review as it is a systematic literature review. The  
20 258 objective is submitting this work and its future development to a peer-reviewed journal and  
21 259 presenting the main findings at Quebec government, national and international meetings  
22 260 and conferences.  
23  
24  
25

26 261

27 262

28 263 **Contributors:** PL, JDL led the design, search strategy and conceptualisation of this work  
29 264 and drafted the protocol. FB performed the search strategy and provided the corresponding  
30 265 results. PL, JDL, MR, KSA, ET, AC, JBG were involved in the conceptualisation of the  
31 266 review design, inclusion and exclusion criteria and provided feedback on the methodology  
32 267 and the manuscript. PL, MR, ET, AC, JBG and JDL were involved in data extraction forms.  
33 268 All authors provided feedback on the manuscript and approval to the publishing of this  
34 269 protocol manuscript.  
35  
36  
37

38 270

39 271 **Funding:** Université Laval - Fonds de démarrage Université Laval (Canada). Soutien à la  
40 272 recherche (SAR) Faculté des Sciences de l'administration - Volet 1A : Démarrage nouveau  
41 273 professeur adjoint (DC132416).  
42  
43

44 274

45 275 **Competing interests:** The authors declare no potential conflict of interest.  
46  
47

48 276

49 277 **Patient consent:** Not required.  
50  
51

52 278

53 279 **Ethics approval:** Research ethics approval is not required for a systematic literature  
54 280 review.  
55  
56

57 281

58 282 **Provenance and peer review:** Not commissioned; externally peer reviewed.  
59  
60

283

284 **Prospero registration number:** CRD42023421145  
285  
286  
287

285

286

287

## 288 REFERENCES

- 289
- 290 1. World Health Organization & United Nations Children's Fund (UNICEF). (2018).  
291 A vision for primary health care in the 21st century: towards universal health  
292 coverage and the Sustainable Development Goals. World Health Organization.  
293 <https://apps.who.int/iris/handle/10665/328065>. Licence: CC BY-NC-SA 3.0 IGO
- 294 2. Starfield B, Shi L, Macinko J. Contribution of primary care to health systems and  
295 health. *Milbank Q* 2005;83:457-502.
- 296 3. Macinko J, Starfield B, Shi L. The contribution of primary care systems to health  
297 outcomes within Organization for Economic Cooperation and Development  
298 (OECD) countries, 1970–1998. *Health Serv Res* 2003;38:831-65.
- 299 4. Adashi E.Y., Geiger H.J., Fine M.D. - Health Care Reform and Primary Care —  
300 The Growing Importance of the Community Health Center. *New England Journal*  
301 *of Medicine* 2010; 362(22) 2047-2050
- 302 5. Wright J, Williams R, Wilkinson J R. Development and importance of health needs  
303 assessment *BMJ* 1998; 316 :1310 doi:10.1136/bmj.316.7140.1310.
- 304 6. Murante A.M., Seghieri C., Vainieri M., Schäfer W.L.A. - Patient-perceived  
305 responsiveness of primary care systems across Europe and the relationship with the  
306 health expenditure and remuneration systems of primary care doctors. *Social*  
307 *Science & Medicine* 2017, 186 139-147, ISSN 0277-9536,  
308 <https://doi.org/10.1016/j.socscimed.2017.06.005>.
- 309 7. Stange KC, Ferrer RL. The paradox of primary care. *Ann Fam Med* 2009;7:293-9.
- 310 8. van Weel, C., Kidd, M.R. (2018) Why strengthening primary health care is essential  
311 to achieving universal health coverage. *Canadian Medical Association Journal*,  
312 190(15) E463-E466, DOI: 10.1503/cmaj.170784
- 313 9. Wilson, T., Roland, M., & Ham, C. (2006). The contribution of general practice  
314 and the general practitioner to NHS patients. *Journal of the Royal Society of*  
315 *Medicine*, 99(1), 24–28. <https://doi.org/10.1258/jrsm.99.1.24>
- 316 10. Kang, M., Robards, F., Luscombe, G. et al. The relationship between having a  
317 regular general practitioner (GP) and the experience of healthcare barriers: a cross-  
318 sectional study among young people in NSW, Australia, with oversampling from  
319 marginalised groups. *BMC Fam Pract* 21, 220 (2020).  
320 <https://doi.org/10.1186/s12875-020-01294-8>
- 321 11. Hoffmann K, Stein KV, Maier M, et al. Access points to the different levels of  
322 health care and demographic predictors in a country without a gatekeeping system.  
323 Results of a cross-sectional study from Austria. *Eur J Pub Health*. 2013;23(6):933–  
324 9.
- 325 12. Pereira Gray DJ, Sidaway-Lee K, White E, et al. Continuity of care with doctors—a  
326 matter of life and death? A systematic review of continuity of care and mortality.  
327 *BMJ Open*. 2018;8:e021161. <https://doi.org/10.1136/bmjopen-2017-021161>.
- 328 13. Philips H, Verhoeve V, Morree SI, et al. . Information campaigns and trained  
329 triagists may support patients in making an appropriate choice between GP and  
330 emergency department. *Eur J Gen Pract*. 2019;25(4):243-244.
- 331 14. Henninger S, Spencer B, Pasche O. Deciding whether to consult the GP or an  
332 emergency department: a qualitative study of patient reasoning in Switzerland. *Eur*  
333 *J Gen Pract*. 2019;25(3):136–142.

- 1  
2  
3 334  
4 335  
5 336  
6 337  
7 338  
8 339  
9 340  
10 341  
11 342  
12 343  
13 344  
14 345  
15 346  
16 347  
17 348  
18 349  
19 350  
20 351  
21 352  
22 353  
23 354  
24 355  
25 356  
26 357  
27 358  
28 359  
29 360  
30 361  
31 362  
32 363  
33 364  
34 365  
35 366  
36 367  
37 368  
38 369  
39 370  
40 371  
41 372  
42 373  
43 374  
44 375  
45 376  
46 377  
47 378  
48 379
15. Henninger, S., Spencer, B., & Pasche, O. (2019). Importance of the GP-patient relationship. *The European journal of general practice*, 25(4), 245. <https://doi.org/10.1080/13814788.2019.1679469>
  16. Gouvernement du Québec, 2017 Le système de santé et de services sociaux au Québec En bref. La direction des communications du ministère de la Santé et des Services sociaux du Québec. Available at <https://publications.msss.gouv.qc.ca/msss/fichiers/2017/17-731-01WF.pdf>
  17. Breton M, Levesque J, Pineault R, Hogg W (2011). L'implantation du modèle des groupes de médecine de famille au Québec : potentiel et limites pour l'accroissement de la performance des soins de santé primaires. *Pratiques et Organisation des Soins*, 42, 101-109. <https://doi.org/10.3917/pos.422.0101>
  18. Breton M., Marshall EG, Deslauriers V, Smithman MA, Moritz LR, Buote R, Morrison B, Christian EK, McKay M, Stringer K, Godard-Sebillotte C, Sourial N, Laberge M, MacKenzie A, Isenor JE, Duhoux A, Ashcroft R, Mathews M, Cossette B, Hudon C, McDougall B, Guénette L, Kirkwood R, Green ME. COVID-19 – an opportunity to improve access to primary care through organizational innovations? A qualitative multiple case study in Quebec and Nova Scotia (Canada). *BMC Health Serv Res* 22, 759 (2022). <https://doi.org/10.1186/s12913-022-08140-w>
  19. Gladu F. P. (2007). Perceived shortage of family doctors in Quebec: can we do something about it?. *Canadian family physician Medecin de famille canadien*, 53(11), 1858–1873.
  20. Maude Laberge, Myriam Gaudreault (2019) Promoting access to family medicine in Québec, Canada: Analysis of bill 20, enacted in November 2015, *Health Policy*, Volume 123, Issue 10, 2019, Pages 901-905, ISSN 0168-8510, <https://doi.org/10.1016/j.healthpol.2019.08.003>.
  21. Lee G, Quesnel-Vallée A. 2019. Improving Access to Family Medicine in Québec through Quotas and Numerical Targets. *Health Reform Observer - Observatoire des Réformes de Santé* 7 (4): Article 2. DOI: <https://doi.org/10.13162/hro-ors.v7i4.3866>
  22. Darvesh N, McGill SC. Improving Access to Primary Care. (CADTH Environmental Scan). CADTH Health Technology Review, Ottawa: CADTH; June 2022.
  23. Russel GM, Hogg W, Lemelin J. Organismes intégrées des soins primaires : La prochaine étape de la réforme des soins primaires. *Canadian Family Physician* 2010; 56: 87–89
  24. Shamseer L, Moher D, Clarke M, Ghersi D, Liberati A, Petticrew M et al. Preferred reporting items for systematic review and meta-analysis protocols (PRISMA-P) 2015: elaboration and explanation *BMJ* 2015; 349 :g7647 doi:10.1136/bmj.g7647
  25. Riva JJ, Malik KM, Burnie SJ, Endicott AR, Busse JW. What is your research question? An introduction to the PICOT format for clinicians. *Journal of Canadian Chiropractic Association*. 2012;56(3):167-171.
  26. The Cochrane Collaboration. Chapter 5: Defining the review question and developing criteria for including studies. In: Higgins JPT, Green S, eds. *Cochrane handbook of systematic reviews*. Version 5.0.1: The Cochrane Collaboration, 2008.
  27. Covidence systematic review software, Veritas Health Innovation, Melbourne, Australia. Available at [www.covidence.org](http://www.covidence.org)



- 1  
2  
3 380 28. Patrick Bellerose, 599 jours d'attente pour avoir son médecin de famille au Québec.  
4 381 August 2<sup>nd</sup>, 2021. Accessed on May 13<sup>th</sup>, 2022  
5 382 <https://www.tvanouvelles.ca/2021/08/02/599-jours-dattente-pour-avoir-son->  
6 383 [medecin-de-famille-au-quebec](https://www.tvanouvelles.ca/2021/08/02/599-jours-dattente-pour-avoir-son-)  
7  
8 384 29. Hong, Q. N., Gonzalez-Reyes, A., Pluye, P. (2018). Improving the usefulness of a  
9 385 tool for appraising the quality of qualitative, quantitative and mixed methods  
10 386 studies, the Mixed Methods Appraisal Tool (MMAT). *Journal of Evaluation in*  
11 387 *Clinical Practice*, 24(3), 459-467.  
12 388 30.  
13 389 Hong, Q. N., & Pluye, P. (2018). A conceptual framework for critical appraisal in  
14 390 systematic mixed studies reviews. *Journal of Mixed Methods Research*, Advance online  
15 391 publication, <https://doi.org/10.1177/1558689818770058>  
16 391  
17 392  
18 393

## Supplementary material 1 - Distribution of GPs by administrative region in Quebec province

| Administrative region            | GPs or Family doctors <sup>1</sup> | Inhabitants (year 2022) <sup>2</sup> | GP each 1000 inhabitants |
|----------------------------------|------------------------------------|--------------------------------------|--------------------------|
| 01 Bas-Saint-Laurent             | 287                                | 200,507                              | 1.431                    |
| 02 Saguenay-Lac-St-Jean          | 388                                | 282,330                              | 1.374                    |
| 03 Québec                        | 1,084                              | 771,611                              | 1.405                    |
| 04 Mauricie                      | 350                                | 281,163                              | 1.245                    |
| 05 Estrie                        | 409                                | 507,208                              | 0.806                    |
| 06 Montréal                      | 2,649                              | 2,038,845                            | 1.299                    |
| 07 Outaouais                     | 445                                | 408,979                              | 1.088                    |
| 08 Abitibi-Témiscamingue         | 200                                | 148,493                              | 1.347                    |
| 09 Côte-Nord                     | 154                                | 90,405                               | 1.703                    |
| 10 Nord du Québec                | 152                                | 46,916                               | 3.240                    |
| 11 Gaspésie-Îles-de-la-Madeleine | 196                                | 92,403                               | 2.121                    |
| 12 Chaudière-Appalaches          | 443                                | 444,072                              | 0.998                    |
| 13 Laval                         | 462                                | 446,476                              | 1.035                    |
| 14 Lanaudière                    | 500                                | 544,265                              | 0.919                    |
| 15 Laurentides                   | 671                                | 657,375                              | 1.021                    |
| 16 Montérégie                    | 1,644                              | 1,475,578                            | 1.114                    |
| 17 Centre-du-Québec              | 244                                | 259,033                              | 0.942                    |
| <b>Total</b>                     | <b>10,278</b>                      | <b>8,695,659</b>                     | <b>1.182</b>             |

Sources :

<sup>1</sup> Collège des médecins du Québec - Répartition des médecins selon la région administrative - <http://www.cmq.org/statistiques/region.aspx> - last access April 27th, 2023

<sup>2</sup> Institut de la statistique du Québec - Principaux indicateurs sur le Québec et ses régions (<https://statistique.quebec.ca/fr/vitrine/region>)- last access April 15th, 2023

**PRISMA-P (Preferred Reporting Items for Systematic review and Meta-Analysis Protocols) 2015 checklist: recommended items to address in a systematic review protocol\***

| Section and topic                 | Item No | Checklist item                                                                                                                                                                                                                | Yes/No | Line               | Description              |
|-----------------------------------|---------|-------------------------------------------------------------------------------------------------------------------------------------------------------------------------------------------------------------------------------|--------|--------------------|--------------------------|
| <b>ADMINISTRATIVE INFORMATION</b> |         |                                                                                                                                                                                                                               |        |                    |                          |
| Title:                            |         |                                                                                                                                                                                                                               |        |                    |                          |
| Identification                    | 1a      | Identify the report as a protocol of a systematic review                                                                                                                                                                      | Yes    | 1-2                |                          |
| Update                            | 1b      | If the protocol is for an update of a previous systematic review, identify as such (No)                                                                                                                                       | N.A.   |                    | Requested                |
| Registration                      | 2       | If registered, provide the name of the registry (such as PROSPERO) and registration number                                                                                                                                    | N.A.   |                    | Registered on PROSPERO   |
| Authors:                          |         |                                                                                                                                                                                                                               |        |                    |                          |
| Contact                           | 3a      | Provide name, institutional affiliation, e-mail address of all protocol authors; provide physical mailing address of corresponding author                                                                                     | Yes    | 4-18               |                          |
| Contributions                     | 3b      | Describe contributions of protocol authors and identify the guarantor of the review                                                                                                                                           | Yes    | 263-269            |                          |
| Amendments                        | 4       | If the protocol represents an amendment of a previously completed or published protocol, identify as such and list changes; otherwise, state plan for documenting important protocol amendments                               | N.A.   |                    | Not applicable           |
| Support:                          |         |                                                                                                                                                                                                                               |        |                    |                          |
| Sources                           | 5a      | Indicate sources of financial or other support for the review                                                                                                                                                                 | Yes    | 271-273            |                          |
| Sponsor                           | 5b      | Provide name for the review funder and/or sponsor                                                                                                                                                                             | Yes    | 271-273            |                          |
| Role of sponsor or funder         | 5c      | Describe roles of funder(s), sponsor(s), and/or institution(s), if any, in developing the protocol                                                                                                                            | N.A.   |                    | Not applicable           |
| <b>INTRODUCTION</b>               |         |                                                                                                                                                                                                                               |        |                    |                          |
| Rationale                         | 6       | Describe the rationale for the review in the context of what is already known                                                                                                                                                 | Yes    | 77-120             |                          |
| Objectives                        | 7       | Provide an explicit statement of the question(s) the review will address with reference to participants, interventions, comparators, and outcomes (PICO)                                                                      | Yes    | 171-193            |                          |
| <b>METHODS</b>                    |         |                                                                                                                                                                                                                               |        |                    |                          |
| Eligibility criteria              | 8       | Specify the study characteristics (such as PICO, study design, setting, time frame) and report characteristics (such as years considered, language, publication status) to be used as criteria for eligibility for the review | Yes    | 139-153            |                          |
| Information sources               | 9       | Describe all intended information sources (such as electronic databases, contact with study authors, trial registers or other grey literature sources) with planned dates of coverage                                         | Yes    | 157-167<br>183-185 |                          |
| Search strategy                   | 10      | Present draft of search strategy to be used for at least one electronic database, including planned                                                                                                                           | Yes    | 171-193            | Supplementary material 2 |

| limits, such that it could be repeated |     |                                                                                                                                                                                                                                                  |      |                                  |
|----------------------------------------|-----|--------------------------------------------------------------------------------------------------------------------------------------------------------------------------------------------------------------------------------------------------|------|----------------------------------|
| Study records:                         |     |                                                                                                                                                                                                                                                  |      |                                  |
| Data management                        | 11a | Describe the mechanism(s) that will be used to manage records and data throughout the review                                                                                                                                                     | Yes  | 197-218                          |
| Selection process                      | 11b | State the process that will be used for selecting studies (such as two independent reviewers) through each phase of the review (that is, screening, eligibility and inclusion in meta-analysis)                                                  | Yes  | 197-218                          |
| Data collection process                | 11c | Describe planned method of extracting data from reports (such as piloting forms, done independently, in duplicate), any processes for obtaining and confirming data from investigators                                                           | Yes  | 205-231                          |
| Data items                             | 12  | List and define all variables for which data will be sought (such as PICO items, funding sources), any pre-planned data assumptions and simplifications                                                                                          | Yes  | 197-218                          |
| Outcomes and prioritization            | 13  | List and define all outcomes for which data will be sought, including prioritization of main and additional outcomes, with rationale                                                                                                             | Yes  | 207-208 Supplementary material 3 |
| Risk of bias in individual studies     | 14  | Describe anticipated methods for assessing risk of bias of individual studies, including whether this will be done at the outcome or study level, or both; state how this information will be used in data synthesis                             | N.A. | Not applicable                   |
| Data synthesis                         | 15a | Describe criteria under which study data will be quantitatively synthesised                                                                                                                                                                      | Yes  | 213-218                          |
|                                        | 15b | If data are appropriate for quantitative synthesis, describe planned summary measures, methods of handling data and methods of combining data from studies, including any planned exploration of consistency (such as $I^2$ , Kendall's $\tau$ ) | N.A. | Not applicable                   |
|                                        | 15c | Describe any proposed additional analyses (such as sensitivity or subgroup analyses, meta-regression)                                                                                                                                            | N.A. | Not applicable                   |
|                                        | 15d | If quantitative synthesis is not appropriate, describe the type of summary planned                                                                                                                                                               | N.A. |                                  |
| Meta-bias(es)                          | 16  | Specify any planned assessment of meta-bias(es) (such as publication bias across studies, selective reporting within studies)                                                                                                                    | N.A. | Not applicable                   |
| Confidence in cumulative evidence      | 17  | Describe how the strength of the body of evidence will be assessed (such as GRADE)                                                                                                                                                               | Yes  | 223-236 Supplementary material 5 |

**\* It is strongly recommended that this checklist be read in conjunction with the PRISMA-P Explanation and Elaboration (cite when available) for important clarification on the items. Amendments to a review protocol should be tracked and dated. The copyright for PRISMA-P (including checklist) is held by the PRISMA-P Group and is distributed under a Creative Commons Attribution Licence 4.0.**

*From: Shamseer L, Moher D, Clarke M, Ghersi D, Liberati A, Petticrew M, Shekelle P, Stewart L, PRISMA-P Group. Preferred reporting items for systematic review and meta-analysis protocols (PRISMA-P) 2015: elaboration and explanation. BMJ. 2015 Jan 2;349(jan02 1):g7647.*

## Supplementary material 3 – Database search strategy

PubMed

Date of the search: 10-01-2022

Database limit: results will be limited from January 2000 to January 2022.

| # | Search strategy                                                                                                                                                                                                                                                                                                                                                                                                                                                                                                                                                                                                                                                                                                                   | Results |
|---|-----------------------------------------------------------------------------------------------------------------------------------------------------------------------------------------------------------------------------------------------------------------------------------------------------------------------------------------------------------------------------------------------------------------------------------------------------------------------------------------------------------------------------------------------------------------------------------------------------------------------------------------------------------------------------------------------------------------------------------|---------|
| 1 | "Primary Health Care"[Mesh:NoExp] OR Primary Care[TIAB] OR Primary Healthcare[TIAB] OR Primary Health Care[TIAB] OR "Physicians, Family"[Mesh] OR Family Physician*[TIAB] OR Family Practi*[TIAB] OR "General Practitioners"[Mesh] OR "General Practice"[Mesh] OR General Practi*[TIAB]                                                                                                                                                                                                                                                                                                                                                                                                                                           |         |
| 2 | "Health Services Needs and Demand"[Mesh] OR "Health Services Accessibility"[Mesh:NoExp] OR "Delivery of Health Care"[Mesh:NoExp] OR "Health Care Reform"[Mesh] OR "Health Policy"[Mesh:NoExp] OR "Appointments and Schedules"[Mesh:NoExp] OR "Mass Screening/organization and administration"[Mesh:NoExp] OR Outcome and Process Assessment, Health Care[Mesh] OR Quality Indicators, Health Care[Mesh:NoExp] OR Waiting Lists[Mesh] OR Health Polic*[TIAB] OR Healthcare Polic*[TIAB] OR National Polic*[TIAB] OR Healthcare Delivery[TIAB] OR delivery of care[TIAB] OR Health access*[TIAB] OR Healthcare access*[TIAB] OR Health Care Reform*[TIAB] OR primary care demand[TIAB] OR Health demand[TIAB] OR care demande[TIAB] |         |
| 3 | "Quebec"[Mesh] OR Quebec[TIAB]                                                                                                                                                                                                                                                                                                                                                                                                                                                                                                                                                                                                                                                                                                    |         |
| 4 | #1 AND #2 AND #3                                                                                                                                                                                                                                                                                                                                                                                                                                                                                                                                                                                                                                                                                                                  |         |
| 5 | #4 AND 2000/01/01:2022/01/01[dp]                                                                                                                                                                                                                                                                                                                                                                                                                                                                                                                                                                                                                                                                                                  |         |

## Supplementary Material 4 – Data extraction form

| Information used in data extraction | Description                                                                                                         |
|-------------------------------------|---------------------------------------------------------------------------------------------------------------------|
| Study reference                     | Identification of the study (e.g. Smith, 2018)                                                                      |
| Project related to the study        | If the study is related to a specific project (e.g. a trial or some other public or private interventions)          |
| Authors                             | List of authors of the study                                                                                        |
| Country                             | Country where the study was issued                                                                                  |
| Year                                | Year of publication of the study                                                                                    |
| Study design                        | Type of the study design                                                                                            |
| Service type                        | Service type related to primary care                                                                                |
| Participant characteristics         | Information related to patient characteristics (e.g. age, disease, sex, and other useful information of the cohort) |
| Performance measures                | Information related to the performance measures of the activity                                                     |
| Accessibility                       | Information related to the service accessibility for patients                                                       |
| Equity                              | Information related to the access service equity for patients                                                       |
| Health outcomes                     | Types and description of the health outcomes included in the study                                                  |
| Costs                               | Types and description of the health costs (direct and indirect) included in the study                               |
| Clinical area of interest           | Clinical area of interest (e.g. Respiratory, Cardiovascular)                                                        |
| GP role                             | The role of the GP in the study                                                                                     |
| GP activities                       | The activities of the GP in the study                                                                               |
| GP Organisation                     | Type of organisation within the GP works (e.g. Group of GPs)                                                        |

## Supplementary Material 5 - Mixed Methods Appraisal Tool (MMAT), version 2018

| Category of study designs                                                                                                               | Methodological quality criteria                                                                                         | Responses |    |            |          |
|-----------------------------------------------------------------------------------------------------------------------------------------|-------------------------------------------------------------------------------------------------------------------------|-----------|----|------------|----------|
|                                                                                                                                         |                                                                                                                         | Yes       | No | Can't tell | Comments |
| Screening questions (for all types)                                                                                                     | S1. Are there clear research questions?                                                                                 |           |    |            |          |
|                                                                                                                                         | S2. Do the collected data allow to address the research questions?                                                      |           |    |            |          |
| <i>Further appraisal may not be feasible or appropriate when the answer is 'No' or 'Can't tell' to one or both screening questions.</i> |                                                                                                                         |           |    |            |          |
| 1. Qualitative                                                                                                                          | 1.1. Is the qualitative approach appropriate to answer the research question?                                           |           |    |            |          |
|                                                                                                                                         | 1.2. Are the qualitative data collection methods adequate to address the research question?                             |           |    |            |          |
|                                                                                                                                         | 1.3. Are the findings adequately derived from the data?                                                                 |           |    |            |          |
|                                                                                                                                         | 1.4. Is the interpretation of results sufficiently substantiated by data?                                               |           |    |            |          |
|                                                                                                                                         | 1.5. Is there coherence between qualitative data sources, collection, analysis and interpretation?                      |           |    |            |          |
| 2. Quantitative randomized controlled trials                                                                                            | 2.1. Is randomization appropriately performed?                                                                          |           |    |            |          |
|                                                                                                                                         | 2.2. Are the groups comparable at baseline?                                                                             |           |    |            |          |
|                                                                                                                                         | 2.3. Are there complete outcome data?                                                                                   |           |    |            |          |
|                                                                                                                                         | 2.4. Are outcome assessors blinded to the intervention provided?                                                        |           |    |            |          |
|                                                                                                                                         | 2.5. Did the participants adhere to the assigned intervention?                                                          |           |    |            |          |
| 3. Quantitative non-randomized                                                                                                          | 3.1. Are the participants representative of the target population?                                                      |           |    |            |          |
|                                                                                                                                         | 3.2. Are measurements appropriate regarding both the outcome and intervention (or exposure)?                            |           |    |            |          |
|                                                                                                                                         | 3.3. Are there complete outcome data?                                                                                   |           |    |            |          |
|                                                                                                                                         | 3.4. Are the confounders accounted for in the design and analysis?                                                      |           |    |            |          |
|                                                                                                                                         | 3.5. During the study period, is the intervention administered (or exposure occurred) as intended?                      |           |    |            |          |
| 4. Quantitative Descriptive                                                                                                             | 4.1. Is the sampling strategy relevant to address the research question?                                                |           |    |            |          |
|                                                                                                                                         | 4.2. Is the sample representative of the target population?                                                             |           |    |            |          |
|                                                                                                                                         | 4.3. Are the measurements appropriate?                                                                                  |           |    |            |          |
|                                                                                                                                         | 4.4. Is the risk of nonresponse bias low?                                                                               |           |    |            |          |
|                                                                                                                                         | 4.5. Is the statistical analysis appropriate to answer the research question?                                           |           |    |            |          |
| 5. Mixed methods                                                                                                                        | 5.1. Is there an adequate rationale for using a mixed methods design to address the research question?                  |           |    |            |          |
|                                                                                                                                         | 5.2. Are the different components of the study effectively integrated to answer the research question?                  |           |    |            |          |
|                                                                                                                                         | 5.3. Are the outputs of the integration of qualitative and quantitative components adequately interpreted?              |           |    |            |          |
|                                                                                                                                         | 5.4. Are divergences and inconsistencies between quantitative and qualitative results adequately addressed?             |           |    |            |          |
|                                                                                                                                         | 5.5. Do the different components of the study adhere to the quality criteria of each tradition of the methods involved? |           |    |            |          |

Hong, Q. N., Gonzalez-Reyes, A., & Pluye, P. (2018). Improving the usefulness of a tool for appraising the quality of qualitative, quantitative and mixed methods studies, the Mixed Methods Appraisal Tool (MMAT). *Journal of Evaluation in Clinical Practice*, 24(3), 459-467.

Hong, Q. N., & Pluye, P. (2018). A conceptual framework for critical appraisal in systematic mixed studies reviews. *Journal of Mixed Methods Research*, Advance online publication, <https://doi.org/10.1177/1558689818770058>

# BMJ Open

## Impact of Primary health care reforms in Quebec Health Care System: A Systematic Literature Review Protocol

|                                 |                                                                                                                                                                                                                                                                                                                                                                                                                                                                                                                                                                                                                                                                                                                                                                                                                                                                                                 |
|---------------------------------|-------------------------------------------------------------------------------------------------------------------------------------------------------------------------------------------------------------------------------------------------------------------------------------------------------------------------------------------------------------------------------------------------------------------------------------------------------------------------------------------------------------------------------------------------------------------------------------------------------------------------------------------------------------------------------------------------------------------------------------------------------------------------------------------------------------------------------------------------------------------------------------------------|
| Journal:                        | <i>BMJ Open</i>                                                                                                                                                                                                                                                                                                                                                                                                                                                                                                                                                                                                                                                                                                                                                                                                                                                                                 |
| Manuscript ID                   | bmjopen-2022-068666.R2                                                                                                                                                                                                                                                                                                                                                                                                                                                                                                                                                                                                                                                                                                                                                                                                                                                                          |
| Article Type:                   | Protocol                                                                                                                                                                                                                                                                                                                                                                                                                                                                                                                                                                                                                                                                                                                                                                                                                                                                                        |
| Date Submitted by the Author:   | 03-Jul-2023                                                                                                                                                                                                                                                                                                                                                                                                                                                                                                                                                                                                                                                                                                                                                                                                                                                                                     |
| Complete List of Authors:       | Landa, Paolo; Universite Laval Faculté des sciences de l'administration, Département d'opérations et systèmes de décision; Centre de recherche du CHU de Quebec-Universite Laval<br>Lalonde, Jean-Denis; Universite Laval Faculté des sciences de l'administration, Département d'opérations et systèmes de décision<br>Bergeron, Frédéric; Université Laval, Bibliothèque-Direction des services-conseils<br>Kassim, Said; Universite Laval, Département of Management<br>Côté, André; Université Laval, Département de management; Institut universitaire de cardiologie et de pneumologie de Québec<br>Gartner, Jean-Baptiste; Université Laval, Département de management; Centre de recherche du CHU de Quebec-Universite Laval<br>Tanfani, Elena; Università degli Studi di Genova, Dipartimento di Economia<br>Resta, Marina; Università degli Studi di Genova, Dipartimento di Economia |
| <b>Primary Subject Heading</b>: | Public health                                                                                                                                                                                                                                                                                                                                                                                                                                                                                                                                                                                                                                                                                                                                                                                                                                                                                   |
| Secondary Subject Heading:      | Health services research, Health policy                                                                                                                                                                                                                                                                                                                                                                                                                                                                                                                                                                                                                                                                                                                                                                                                                                                         |
| Keywords:                       | PRIMARY CARE, Health policy < HEALTH SERVICES ADMINISTRATION & MANAGEMENT, HEALTH SERVICES ADMINISTRATION & MANAGEMENT, Organisation of health services < HEALTH SERVICES ADMINISTRATION & MANAGEMENT, Protocols & guidelines < HEALTH SERVICES ADMINISTRATION & MANAGEMENT, PUBLIC HEALTH                                                                                                                                                                                                                                                                                                                                                                                                                                                                                                                                                                                                      |
|                                 |                                                                                                                                                                                                                                                                                                                                                                                                                                                                                                                                                                                                                                                                                                                                                                                                                                                                                                 |

SCHOLARONE™  
Manuscripts



1  
2  
3  
4  
5  
6  
7  
8  
9  
10  
11  
12  
13  
14  
15  
16  
17  
18  
19  
20  
21  
22  
23  
24  
25  
26  
27  
28  
29  
30  
31  
32  
33  
34  
35  
36  
37  
38  
39  
40  
41  
42  
43  
44  
45  
46  
47  
48  
49  
50  
51  
52  
53  
54  
55  
56  
57  
58  
59  
60

# 1 Impact of Primary health care reforms in Quebec Health Care System: 2 A Systematic Literature Review Protocol

3  
4 Paolo Landa<sup>1,2\*</sup>, Jean-Denis Lalonde<sup>1</sup>, Frédéric Bergeron<sup>3</sup>, Kassim Said Abasse<sup>2,4,6,7</sup>,  
5 André Côté<sup>2,4,7,8</sup>, Jean-Baptiste Gartner<sup>2,4,6,7,8</sup>, Elena Tànfani<sup>5</sup>, Marina Resta<sup>5</sup>

6 <sup>1</sup>Département d'opérations et systèmes de décision, Faculté des sciences de  
7 l'administration Université Laval, Québec, G1V 0A6, Canada.

8 <sup>2</sup>Centre de recherche du CHU de Québec, Université Laval, Québec, G1V 0A6, Canada

9 <sup>3</sup>Bibliothèque, Direction des services-conseils, Université Laval, Québec, G1V 0A6,  
10 Canada

11 <sup>4</sup>Département de management, Faculté des sciences de l'administration, Université Laval,  
12 Québec, G1V 0A6, Canada.

13 <sup>5</sup>Dipartimento di Economia, Università degli studi di Genova, Genova, 16126, Italy.

14 <sup>6</sup>Centre de recherche en gestion des services de santé, Université Laval, Québec, G1V 0A6,  
15 Canada.

16 <sup>7</sup>VITAM, Centre de recherche en santé durable, Université Laval, Québec, G1V 0A6,  
17 Canada.

18 <sup>8</sup>Centre de recherche du CISSS de Chaudière-Appalaches, Québec, G1V 0A6, Canada.

## 21 \*Corresponding Author

22 Paolo Landa, PhD.

23 Professeur Adjoint

24 Département d'opérations et systèmes de décision

25 Faculté des sciences de l'administration

26 Université Laval, Québec, QC, G1V 0A6, Canada

27 Local 2421, Tel :(+1)418-656-2131 (Ext. 413389)

28 Email: [Paolo.Landa@fsa.ulaval.ca](mailto:Paolo.Landa@fsa.ulaval.ca).

1  
2  
3 **30 Abstract**

4  
5 **31 Introduction:** During the last decade the Quebec Public Health Care System (QPHCS)  
6  
7 **32** had important transformation in primary care planning activity. The increase of the service  
8  
9 **33** demand together with a significative reduction of supply in primary care may be at risk of  
10  
11 **34** reducing access to health care services, with a negative impact on costs and health  
12  
13 **35** outcomes. The aims of this systematic literature review are to map and aggregate existing  
14  
15 **36** literature and evidence on the primary care provided in Quebec, showing the benefits and  
16  
17 **37** limitations associated with the health policies developed in the last two decades, and  
18  
19 **38** highlighting areas of improvement.

20  
21 **39 Methods and Analysis:** PubMed, EMBASE, Web of Science, and CINAHL will be  
22  
23 **40** searched for articles and government reports between January 2000 and January 2022 using  
24  
25 **41** a pre-specified search strategy. This protocol adheres to the Preferred Reporting Items for  
26  
27 **42** Systematic Reviews and Meta-analysis for Protocols and has been registered with  
28  
29 **43** PROSPERO. A wide range of electronic databases and grey literature sources will be  
30  
31 **44** systematically searched using predefined keywords. The review will include any study  
32  
33 **45** design, with the exclusion of protocols, with a focus on the analysis of health care policies,  
34  
35 **46** outcomes, costs and management of the primary health care services, published in either  
36  
37 **47** English or French languages. Two authors will independently screen titles, abstracts, full-  
38  
39 **48** text articles and select studies meeting the inclusion criteria. A customised data extraction  
40  
41 **49** form will be used to extract data from the included studies. Results will be presented in  
42  
43 **50** tabular format developed iteratively by the research team.

44  
45 **51 Ethics and dissemination:** Research ethics approval is not required as exclusively  
46  
47 **52** secondary data will be used. Review findings will synthesise the characteristics and the  
48  
49 **53** impact of the reforms of QPHCS of the last two decades. Findings will therefore be  
50  
51 **54** disseminated in peer-reviewed journals, conference presentations and through discussions  
52  
53 **55** with stakeholders.

54  
55 **56**  
56  
57 **57 Keywords:** Primary care, health care policies, Primary care management, primary care  
58  
59 **58** access, systematic literature review.  
60

1  
2  
3 59 **Strengths and limitations of this study**  
4

- 5 60 ❖ This systematic review protocol follows the Preferred Reporting Items for  
6 Systematic Review and Meta-Analysis Protocols guidelines.  
7 61  
8 62 ❖ The search algorithm was developed by an experienced librarian and customised to  
9 four large databases, including any type of grey literature.  
10 63  
11 64 ❖ The certainty of the evidence of this systematic review may be limited by the  
12 limited number of studies available and the possible low quality of the individual  
13 studies.  
14 65  
15 66 ❖ We aim to create the most comprehensive systematic review providing a  
16 comprehensive view and analysis of the primary care in Quebec Public Health Care  
17 System and its impact on costs, outcomes, accessibility, equity and health  
18 organisation.  
19 68  
20 69 ❖ The systematic literature review will consider only studies published from 2000  
21 onwards and those published in French and English languages.  
22 70  
23  
24 71  
25 72  
26  
27 73  
28  
29 74  
30  
31 75  
32  
33  
34  
35  
36  
37  
38  
39  
40  
41  
42  
43  
44  
45  
46  
47  
48  
49  
50  
51  
52  
53  
54  
55  
56  
57  
58  
59  
60

## 76 BACKGROUND

77 Primary health care services represent an important element in public health care systems.  
78 As reported by the World Health Organization "*Primary Health Care (PHC) is a whole-*  
79 *of-society approach to health that aims at ensuring the highest possible level of health and*  
80 *well-being and their equitable distribution by focusing on people's needs and as early as*  
81 *possible along the continuum from health promotion and disease prevention to treatment,*  
82 *rehabilitation and palliative care, and as close as feasible to people's everyday*  
83 *environment*"[1]. PHC is the most inclusive, equitable, cost-effective, and efficient  
84 approach to enhance people's physical and mental health, as well as social well-being. A  
85 strong primary health care presents lower health costs, better population health, higher  
86 patient satisfaction, fewer inappropriate and unnecessary hospital admissions, better rates  
87 of screening and early detection of chronic diseases, better patient follow-up for patients,  
88 a better management of patients with multimorbidity, and finally greater socioeconomic  
89 equity [2-8].

90 The PHC services include the general practitioners (GP) or family physicians, who  
91 represent generally the first point of contact of individuals with the health care system, and  
92 focus care on the individual within the community, delivering services across the entire  
93 spectrum of care (e.g., mental health, preventive medicine, respiratory diseases). They play  
94 an important role in health promotion and illness prevention, coordinating care with other  
95 specialties and health professionals, and advocating on behalf of their patients with respect  
96 to the care and services they need in all parts of the health care system. The importance of  
97 GPs for patients is highlighted in the international literature [9-14]. The physician's  
98 personal commitment to the patient is one of the most important determinants of the  
99 patient's sense of safety, and it has a large impact on patient decision to consult a specialist  
100 or to access to an Emergency Department (ED) [15].

101 Canada has a decentralised and universal publicly funded health care system with the  
102 funding and administrations of health care primarily managed by the thirteen Provinces  
103 and territories and the entire country. Each province has its own insurance plan and each  
104 province receive money and assistance from federal government on a per-capita basis. Each  
105 system is managed publicly and it is accessible to any citizen (universally). Each provincial

1  
2  
3 106 government is responsible for the management, organisation, and delivery of health care  
4  
5 107 services for Canadians. The insurance plans developed by each province must meet the  
6  
7 108 standards of the Canadian Health Act to access to federal funds.

8 109 Two reforms were introduced since the early 2000 (Family Medicine Group in 2003 and  
9  
10 110 Bill 20 in 2015) aimed at maximising medical and financial resource use in order to  
11  
12 111 improve the patient access in primary care [16,17]. However, actually the accessibility to  
13  
14 112 primary care for patients still represent a public health issue in Québec (Supplementary  
15  
16 113 material 1). In addition, since the beginning of the COVID-19 pandemics, the accessibility  
17  
18 114 to primary health care worsened [18]. This problem was already reported previously [19-  
19  
20 115 22] and it still represent a challenge for the government [23,24].  
21  
22 116

23 117 The aim of this work consists in studying, through this systematic literature review, the last  
24  
25 118 two decades of the QPHCS primary care and the impact of the reforms developed on health  
26  
27 119 organisation, costs, health outcomes, accessibility, equity and services, considering health  
28  
29 120 care system perspective.  
30  
31 121

32 122

## 33 123 **METHODS AND ANALYSIS**

34 124  
35 125 This protocol has been prepared using the Preferred Reporting Items for Systematic  
36  
37 126 Reviews and Meta-Analyses Protocols guidelines [25], as shown in PRISMA-P checklist  
38  
39 127 (Supplementary material 2). Important amendments made to the protocol will be  
40  
41 128 documented and published alongside the results of the systematic review.  
42  
43 129

### 44 130 **Research question**

45 131  
46 132 This systematic literature review will synthesise the scientific literature on interventions  
47  
48 133 that have been developed in QPHCS, focusing on Primary care and GPs activities, together  
49  
50 134 with a collection of the evidence for assessing health outcomes, costs, equity and  
51  
52 135 accessibility for Quebec adult population.

53 136

### 54 137 **Eligibility criteria**

55 138  
56  
57  
58  
59  
60

1  
2  
3 139 The criteria for the study selection will be based on studies that will explicitly analyse the  
4 140 impact of any policy implementation or activity provided where GPs or family doctors are  
5 141 included, together with the information about corresponding health outcomes, costs,  
6 142 accessibility or performance on system organisation.  
7  
8  
9

10 143

#### 11 144 **Study design/characteristics**

12 145

13 146 Target studies will include Meta-Analysis, Systematic Review, Randomized Controlled  
14 147 Trial, Cohort study (Prospective Observational Study), Case-control study, Cross-sectional  
15 148 study, Case Reports, Series, Quasi-experimental design, Difference in Difference analysis,  
16 149 natural experiments, regression discontinuity design that show the impact of GP activities  
17 150 on health outcomes, costs, accessibility, health organisation and management, services in  
18 151 QPHCS. We will consider also summary papers, government and public health reports and  
19 152 other analyses to identify relevant primary papers. Study protocols will not be considered  
20 153 in this systematic literature review.  
21  
22  
23  
24  
25  
26

27 154

#### 28 155 **Information sources**

29 156

30 157 A research of academic databases including: PubMed, EMBASE, Web of Science, and  
31 158 Cumulative Index to Nursing and Allied Health Literature (CINAHL) will be performed  
32 159 by an author experienced in conducting systematic reviews (FB). The search will look for  
33 160 potentially relevant articles using predefined strategies (Supplementary material 3). A  
34 161 manual search of the reference lists of the studies will be performed in order to check for  
35 162 any additional possible relevant articles. The manual search will be based on backward  
36 163 snowballing search that will involve search of the reference list of the articles selected and  
37 164 identified. In addition, for some of the relevant journals will be performed a hand search to  
38 165 ensure a saturation of the literature. Grey literature will be included in order to explore all  
39 166 the available documentation published. Studies will be excluded if they do not investigate  
40 167 on QPHCS.  
41  
42  
43  
44  
45  
46  
47  
48  
49

50 168

#### 51 169 **Search strategy**

52 170

53  
54 171 The search strategy (Table 1) will be reviewed by the first (PL) and the second (JDL)  
55 172 author, together with the supervision of the third author that is a medical librarian able to  
56  
57  
58  
59  
60

173 provide the support and the guidance on search terms and strategies (FB). The search  
 174 strategy will combine MeSH terms and free text words such as (Primary Health Care OR  
 175 Primary Care OR Primary Healthcare OR Family Physicians OR Family Practitioner OR  
 176 General Practitioners OR General Practice AND Health Services Needs and Demand OR  
 177 Health Services Accessibility OR Delivery of Health Care OR Health Care Reform OR  
 178 Health Policy OR Appointments and Schedules OR Mass Screening/organization and  
 179 administration OR Outcome and Process Assessment, Health Care OR Quality Indicators,  
 180 Health Care OR Waiting Lists OR Health Policy OR Healthcare Policy OR National Policy  
 181 OR Healthcare Delivery OR delivery of care OR Health access OR Healthcare access OR  
 182 Health Care Reform OR primary care demand OR Health demand OR care demand AND  
 183 Quebec). The search strategy will have filters limiting studies to 2000 onwards, and studies  
 184 published in English or French. The time limitation is chosen as by the early 2000s, the  
 185 Family Medicine Groups were introduced as a new primary care model. The literature  
 186 review searches will be updated at the end of the search process. In addition, using the  
 187 Population, Intervention, Comparison, Outcome, Timing and Study design (PICOTS)  
 188 strategy [26,27], we elaborated the guiding question of this review to ensure the systematic  
 189 search of available literature: “What is the impact of last two decades of primary health  
 190 care reforms for GP activities on health outcomes, costs, equity and accessibility for  
 191 Quebec adult population?”.

192

| PICOS strategy   | Inclusion criteria                                                                                                        | Exclusion criteria                                                                            |
|------------------|---------------------------------------------------------------------------------------------------------------------------|-----------------------------------------------------------------------------------------------|
| P – Population   | Primary health care reform/setting/practice/activities in Quebec                                                          | Infants and adolescents treated in Quebec province and adults treated outside Quebec province |
| I – Intervention | Any health care treatment and activity performed by Primary Care organisations and GPs that are affected from PHC reforms | Any individual activity in Primary Care that is not related to PHC reforms                    |
| C – Comparison   | No comparator                                                                                                             |                                                                                               |

|                  |                                                                                                                                                                                                                                                                                                       |                                    |
|------------------|-------------------------------------------------------------------------------------------------------------------------------------------------------------------------------------------------------------------------------------------------------------------------------------------------------|------------------------------------|
| O – Outcomes     | Health outcomes (e.g. QALYs), costs, equity and accessibility                                                                                                                                                                                                                                         |                                    |
| T - Timing       | Studies from 2000 onwards                                                                                                                                                                                                                                                                             | Studies published before year 2000 |
| S – Study design | Meta-Analysis, Systematic Review, Randomized Controlled Trial, Cohort Study (Prospective Observational Study), Case-control Study, Cross-sectional study, Case Reports and Series, Quasi-experimental design, Difference in Difference analysis, natural experiments, regression discontinuity design | Protocols                          |

Table 1 - Inclusion and exclusion criteria

### Screening, data collection and extraction

The abstracts and full-text articles retrieved from the search strategy will be undertaken using Covidence® ([www.covidence.org](http://www.covidence.org)) [28], an online systematic review tool recommended by the Cochrane Collaboration, and duplicates will be removed. Two authors (PL,JDL) will independently assess titles and abstracts of records, and exclude articles that will not meet eligibility criteria. Disagreements between the selected papers made by the two authors will be resolved by discussion or by a third author (KSA, JBG, AC, MR or ET). Four authors will independently extract and record data from included studies using a predefined data extraction form (PL, JDL, JBG, MR).

The authors will pilot the data extraction form with a sample of a limited number of papers (10) and amendments will be made as necessary. After the evaluation of piloting, the data extraction will be developed and completed. The data extraction form will include the information reported in the Supplementary material 4. Other additional information will be included during the review process. If additional information will be required from the studies, study authors will be contacted. At the end of data extraction, four authors (PL,



1  
2  
3 211 JDL, JBG, MR) will resolve any discrepancies that will be present applying a consensus-  
4 212 based decision, or if necessary, discussion with a fifth author (AC).

5  
6 213 Data synthesis will be undertaken through a narrative approach, providing detailed written  
7  
8 214 commentary on the data extracted previously. This will help in the understanding of the  
9  
10 215 impact of GPs activity to the delivery of care and the related issues. In addition, summary  
11  
12 216 tables will be used to present data in a structured format. We will use a convergent synthesis  
13  
14 217 design to synthesise qualitative, quantitative and mixed-method results [29]. Thus, using a  
15  
16 218 thematic synthesis procedure, we will synthesise the evidence from the selected studies.

### 219 220 **Quality assessment**

221  
222  
223 Two independent authors (PL, JDL) will assess the methodological quality of eligible  
224  
225 studies. Two independent authors will score the selected studies and disagreements will  
226  
227 be resolved by a third author (KSA, JBG, AC, MR or ET). For quality assessment we will  
228  
229 use the Mixed Methods Appraisal Tool (MMAT), that is a critical appraisal tool that is  
230  
231 designed for the appraisal stage of systematic mixed studies reviews that include  
232  
233 qualitative, quantitative and mixed methods studies. It enables the appraisal of five  
234  
235 categories of methodologies such as qualitative research, randomized controlled trials, non-  
236  
237 randomized studies, quantitative descriptive studies, and mixed methods studies  
(Supplementary material 5) [30].

### 238 239 **Cumulative evidence**

240  
241 We will use the MMAT approach to assess the certainty of the evidence for each study,  
242  
243 and will present the data results on the MMAT rating tables.

### 244 245 **Discussion**

246  
247 To our knowledge, this systematic review will be the first to synthesise the available  
248  
249 evidence on the impact of the last two decades reforms on primary health care organisation  
250  
251 in Quebec evaluating several dimensions (e.g. costs, health outcomes, services  
252  
253 accessibility, equity). The results of this review will also inform policy-makers and leaders  
254  
255 of Quebec Public health. Our results may highlight gaps in knowledge and guide future  
256  
257 research concerned with the primary health care organization in Quebec.

1  
2  
3 2464  
5 2476 248 **Patient and public involvement**

7 249

8 250 Patients were not directly involved in the design of this study. As this is a protocol for a  
9 251 systematic literature review and no participant recruitment will take place, their  
10 252 involvement on the recruitment and dissemination of findings to participants was not  
11 253 applicable.

12 254

13 255 **ETHICS AND DISSEMINATION**

14 256

15 257 This study does not require the ethical review as it is a systematic literature review. The  
16 258 objective is submitting this work and its future development to a peer-reviewed journal and  
17 259 presenting the main findings at Quebec government, national and international meetings  
18 260 and conferences.

19 261

20 262

21 263 **Contributors:** PL, JDL led the design, search strategy and conceptualisation of this work  
22 264 and drafted the protocol. FB performed the search strategy and provided the corresponding  
23 265 results. PL, JDL, MR, KSA, ET, AC, JBG were involved in the conceptualisation of the  
24 266 review design, inclusion and exclusion criteria and provided feedback on the methodology  
25 267 and the manuscript. PL, MR, ET, AC, JBG and JDL were involved in data extraction forms.  
26 268 All authors provided feedback on the manuscript and approval to the publishing of this  
27 269 protocol manuscript.

28 270

29 271 **Funding:** Université Laval - Fonds de démarrage Université Laval (Canada). Soutien à la  
30 272 recherche (SAR) Faculté des Sciences de l'administration - Volet 1A : Démarrage nouveau  
31 273 professeur adjoint (DC132416).

32 274

33 275 **Competing interests:** The authors declare no potential conflict of interest.

34 276

35 277 **Patient consent:** Not required.

36 278

37 279 **Ethics approval:** Research ethics approval is not required for a systematic literature  
38 280 review.

39 281

40 282 **Provenance and peer review:** Not commissioned; externally peer reviewed.

41 283

42 284 **Prospero registration number:** CRD42023421145

43 285

44 286

45 287

## 288 REFERENCES

- 289
- 290 1. World Health Organization & United Nations Children's Fund (UNICEF). (2018).  
291 A vision for primary health care in the 21st century: towards universal health  
292 coverage and the Sustainable Development Goals. World Health Organization.  
293 <https://apps.who.int/iris/handle/10665/328065>. Licence: CC BY-NC-SA 3.0 IGO
- 294 2. Starfield B, Shi L, Macinko J. Contribution of primary care to health systems and  
295 health. *Milbank Quarterly* 2005;83:457-502.
- 296 3. Macinko J, Starfield B, Shi L. The contribution of primary care systems to health  
297 outcomes within Organization for Economic Cooperation and Development  
298 (OECD) countries, 1970–1998. *Health Service Research* 2003;38:831-65.
- 299 4. Adashi EY, Geiger HJ, Fine MD - Health Care Reform and Primary Care — The  
300 Growing Importance of the Community Health Center. *New England Journal of*  
301 *Medicine* 2010; 362(22) 2047-2050
- 302 5. Wright J, Williams R, Wilkinson J R. Development and importance of health needs  
303 assessment *British Medical Journal* 1998; 316 :1310  
304 doi:10.1136/bmj.316.7140.1310.
- 305 6. Murante AM, Seghieri C, Vainieri M, Schäfer WLA - Patient-perceived  
306 responsiveness of primary care systems across Europe and the relationship with the  
307 health expenditure and remuneration systems of primary care doctors. *Social*  
308 *Science & Medicine* 2017, 186 139-147, ISSN 0277-9536,  
309 <https://doi.org/10.1016/j.socscimed.2017.06.005>.
- 310 7. Stange KC, Ferrer RL. The paradox of primary care. *Ann Fam Med* 2009;7:293-9.
- 311 8. van Weel C, Kidd MR. Why strengthening primary health care is essential to  
312 achieving universal health coverage. *Canadian Medical Association Journal* 2018  
313 190(15) E463-E466, DOI: 10.1503/cmaj.170784
- 314 9. Wilson T, Roland M, Ham C. The contribution of general practice and the general  
315 practitioner to NHS patients. *Journal of the Royal Society of Medicine*, 2006 99(1),  
316 24–28. <https://doi.org/10.1258/jrsm.99.1.24>
- 317 10. Kang M, Robards F, Luscombe G, Sancu L, Usherwood T. The relationship between  
318 having a regular general practitioner (GP) and the experience of healthcare barriers:  
319 a cross-sectional study among young people in NSW, Australia, with oversampling  
320 from marginalised groups. *BMC Fam Pract* 21, 220 (2020).  
321 <https://doi.org/10.1186/s12875-020-01294-8>
- 322 11. Hoffmann K, Stein KV, Maier M, et al. Access points to the different levels of  
323 health care and demographic predictors in a country without a gatekeeping system.  
324 Results of a cross-sectional study from Austria. *Eur J Pub Health*. 2013;23(6):933–  
325 9.
- 326 12. Pereira Gray DJ, Sidaway-Lee K, White E, et al. Continuity of care with doctors—a  
327 matter of life and death? A systematic review of continuity of care and mortality.  
328 *BMJ Open*. 2018;8:e021161. <https://doi.org/10.1136/bmjopen-2017-021161>.
- 329 13. Philips H, Verhoeve V, Morree SI, et al. . Information campaigns and trained  
330 triagists may support patients in making an appropriate choice between GP and  
331 emergency department. *Eur J Gen Pract*. 2019;25(4):243-244.
- 332 14. Henninger S, Spencer B, Pasche O. Deciding whether to consult the GP or an  
333 emergency department: a qualitative study of patient reasoning in Switzerland. *Eur*  
334 *J Gen Pract*. 2019;25(3):136–142.

- 1  
2  
3 335 15. Henninger S, Spencer B, & Pasche O. Importance of the GP-patient relationship.  
4 336 The European journal of general practice, 2019, 25(4), 245.  
5 337 <https://doi.org/10.1080/13814788.2019.1679469>  
6 338 16. Gouvernement du Québec, 2017 Le système de santé et de services sociaux au  
7 339 Québec En bref. La direction des communications du ministère de la Santé et des  
8 340 Services sociaux du Québec. Available at  
9 341 <https://publications.msss.gouv.qc.ca/msss/fichiers/2017/17-731-01WF.pdf>  
10 342 17. Breton M, Levesque J, Pineault R, Hogg W. L'implantation du modèle des groupes  
11 343 de médecine de famille au Québec : potentiel et limites pour l'accroissement de la  
12 344 performance des soins de santé primaires. *Pratiques et Organisation des Soins*,  
13 345 2011, 42, 101-109. <https://doi.org/10.3917/pos.422.0101>  
14 346 18. Breton M, Marshall EG, Deslauriers V, Smithman MA, Moritz LR, Buote R,  
15 347 Morrison B, Christian EK, McKay M, Stringer K, Godard-Sebillotte C, Sourial N,  
16 348 Laberge M, MacKenzie A, Isenor JE, Duhoux A, Ashcroft R, Mathews M, Cossette  
17 349 B, Hudon C, McDougall B, Guénette L, Kirkwood R, Green ME. COVID-19 – an  
18 350 opportunity to improve access to primary care through organizational innovations?  
19 351 A qualitative multiple case study in Quebec and Nova Scotia (Canada). *BMC*  
20 352 *Health Service Research* 2022, 22, 759. [https://doi.org/10.1186/s12913-022-](https://doi.org/10.1186/s12913-022-08140-w)  
21 353 [08140-w](https://doi.org/10.1186/s12913-022-08140-w)  
22 354 19. Gladu FP. Perceived shortage of family doctors in Quebec: can we do something  
23 355 about it?. *Canadian family physician Medecin de famille canadien*, 2007, 53(11),  
24 356 1858–1873.  
25 357 20. Laberge M, Gaudreault M. Promoting access to family medicine in Québec,  
26 358 Canada: Analysis of bill 20, enacted in November 2015, *Health Policy*, 2019, 123  
27 359 (10), 901-905, ISSN 0168-8510, <https://doi.org/10.1016/j.healthpol.2019.08.003>.  
28 360 21. Lee G, Quesnel-Vallée A. Improving Access to Family Medicine in Québec  
29 361 through Quotas and Numerical Targets. *Health Reform Observer - Observatoire*  
30 362 *des Réformes de Santé* 2019, 7 (4): Article 2. DOI: [https://doi.org/10.13162/hro-](https://doi.org/10.13162/hro-ors.v7i4.3866)  
31 363 [ors.v7i4.3866](https://doi.org/10.13162/hro-ors.v7i4.3866)  
32 364 22. Darvesh N, McGill SC. Improving Access to Primary Care. (CADTH  
33 365 Environmental Scan). CADTH Health Technology Review, Ottawa: CADTH; June  
34 366 2022.  
35 367 23. Russel GM, Hogg W, Lemelin J. Organismes intégrées des soins primaires : La  
36 368 prochaine étape de la réforme des soins primaires. *Canadian Family Physician*  
37 369 2010; 56: 87–89  
38 370 24. Patrick Bellerose, 599 jours d'attente pour avoir son médecin de famille au Québec.  
39 371 August 2nd, 2021. (Accessed on May 13th, 2022)  
40 372 [https://www.tvanouvelles.ca/2021/08/02/599-jours-dattente-pour-avoir-son-](https://www.tvanouvelles.ca/2021/08/02/599-jours-dattente-pour-avoir-son-medecin-de-famille-au-quebec)  
41 373 [medecin-de-famille-au-quebec](https://www.tvanouvelles.ca/2021/08/02/599-jours-dattente-pour-avoir-son-medecin-de-famille-au-quebec)  
42 374 25. Shamseer L, Moher D, Clarke M, Ghersi D, Liberati A, Petticrew M et al. Preferred  
43 375 reporting items for systematic review and meta-analysis protocols (PRISMA-P)  
44 376 2015: elaboration and explanation *BMJ* 2015; 349 :g7647 doi:10.1136/bmj.g7647  
45 377 26. Riva JJ, Malik KM, Burnie SJ, Endicott AR, Busse JW. What is your research  
46 378 question? An introduction to the PICOT format for clinicians. *Journal of Canadian*  
47 379 *Chiropractic Association*. 2012;56(3):167-171.

- 1  
2  
3 380 27. The Cochrane Collaboration. Chapter 5: Defining the review question and  
4 381 developing criteria for including studies. In: Higgins JPT, Green S, eds. Cochrane  
5 382 handbook of systematic reviews. Version 5.0.1: The Cochrane Collaboration, 2008.  
6 383  
7 383 28. Covidence systematic review software, Veritas Health Innovation, Melbourne,  
8 384 Australia. Available at [www.covidence.org](http://www.covidence.org)  
9 385  
10 386 29. Hong QN, Gonzalez-Reyes A, Pluye P. Improving the usefulness of a tool for  
11 387 appraising the quality of qualitative, quantitative and mixed methods studies, the  
12 388 Mixed Methods Appraisal Tool (MMAT). *Journal of Evaluation in Clinical  
13 389 Practice*, 2018 24(3), 459-467.  
14 389  
15 390 30. Hong, QN, Pluye, P. A conceptual framework for critical appraisal in systematic  
16 391 mixed studies reviews. *Journal of Mixed Methods Research*, Advance 2018 online  
17 392 publication, <https://doi.org/10.1177/1558689818770058>  
18 393

## Supplementary material 1 - Distribution of GPs by administrative region in Quebec province

| Administrative region            | GPs or Family doctors <sup>1</sup> | Inhabitants (year 2022) <sup>2</sup> | GP each 1000 inhabitants |
|----------------------------------|------------------------------------|--------------------------------------|--------------------------|
| 01 Bas-Saint-Laurent             | 287                                | 200,507                              | 1.431                    |
| 02 Saguenay-Lac-St-Jean          | 388                                | 282,330                              | 1.374                    |
| 03 Québec                        | 1,084                              | 771,611                              | 1.405                    |
| 04 Mauricie                      | 350                                | 281,163                              | 1.245                    |
| 05 Estrie                        | 409                                | 507,208                              | 0.806                    |
| 06 Montréal                      | 2,649                              | 2,038,845                            | 1.299                    |
| 07 Outaouais                     | 445                                | 408,979                              | 1.088                    |
| 08 Abitibi-Témiscamingue         | 200                                | 148,493                              | 1.347                    |
| 09 Côte-Nord                     | 154                                | 90,405                               | 1.703                    |
| 10 Nord du Québec                | 152                                | 46,916                               | 3.240                    |
| 11 Gaspésie-Îles-de-la-Madeleine | 196                                | 92,403                               | 2.121                    |
| 12 Chaudière-Appalaches          | 443                                | 444,072                              | 0.998                    |
| 13 Laval                         | 462                                | 446,476                              | 1.035                    |
| 14 Lanaudière                    | 500                                | 544,265                              | 0.919                    |
| 15 Laurentides                   | 671                                | 657,375                              | 1.021                    |
| 16 Montérégie                    | 1,644                              | 1,475,578                            | 1.114                    |
| 17 Centre-du-Québec              | 244                                | 259,033                              | 0.942                    |
| <b>Total</b>                     | <b>10,278</b>                      | <b>8,695,659</b>                     | <b>1.182</b>             |

Sources :

<sup>1</sup> Collège des médecins du Québec - Répartition des médecins selon la région administrative - <http://www.cmq.org/statistiques/region.aspx> - last access April 27th, 2023

<sup>2</sup> Institut de la statistique du Québec - Principaux indicateurs sur le Québec et ses régions (<https://statistique.quebec.ca/fr/vitrine/region>)- last access April 15th, 2023

**PRISMA-P (Preferred Reporting Items for Systematic review and Meta-Analysis Protocols) 2015 checklist: recommended items to address in a systematic review protocol\***

| Section and topic                 | Item No | Checklist item                                                                                                                                                                                                                | Yes/No | Line    | Description                                                  |
|-----------------------------------|---------|-------------------------------------------------------------------------------------------------------------------------------------------------------------------------------------------------------------------------------|--------|---------|--------------------------------------------------------------|
| <b>ADMINISTRATIVE INFORMATION</b> |         |                                                                                                                                                                                                                               |        |         |                                                              |
| Title:                            |         |                                                                                                                                                                                                                               |        |         |                                                              |
| Identification                    | 1a      | Identify the report as a protocol of a systematic review                                                                                                                                                                      | Yes    | 1-2     |                                                              |
| Update                            | 1b      | If the protocol is for an update of a previous systematic review, identify as such (No)                                                                                                                                       | N.A.   |         | Requested                                                    |
| Registration                      | 2       | If registered, provide the name of the registry (such as PROSPERO) and registration number                                                                                                                                    | N.A.   |         | Registered on PROSPERO – Registration number: CRD42023421145 |
| Authors:                          |         |                                                                                                                                                                                                                               |        |         |                                                              |
| Contact                           | 3a      | Provide name, institutional affiliation, e-mail address of all protocol authors; provide physical mailing address of corresponding author                                                                                     | Yes    | 4-18    |                                                              |
| Contributions                     | 3b      | Describe contributions of protocol authors and identify the guarantor of the review                                                                                                                                           | Yes    | 263-269 |                                                              |
| Amendments                        | 4       | If the protocol represents an amendment of a previously completed or published protocol, identify as such and list changes; otherwise, state plan for documenting important protocol amendments                               | N.A.   |         | Not applicable                                               |
| Support:                          |         |                                                                                                                                                                                                                               |        |         |                                                              |
| Sources                           | 5a      | Indicate sources of financial or other support for the review                                                                                                                                                                 | Yes    | 271-273 |                                                              |
| Sponsor                           | 5b      | Provide name for the review funder and/or sponsor                                                                                                                                                                             | Yes    | 271-273 |                                                              |
| Role of sponsor or funder         | 5c      | Describe roles of funder(s), sponsor(s), and/or institution(s), if any, in developing the protocol                                                                                                                            | N.A.   |         | Not applicable                                               |
| <b>INTRODUCTION</b>               |         |                                                                                                                                                                                                                               |        |         |                                                              |
| Rationale                         | 6       | Describe the rationale for the review in the context of what is already known                                                                                                                                                 | Yes    | 77-120  |                                                              |
| Objectives                        | 7       | Provide an explicit statement of the question(s) the review will address with reference to participants, interventions, comparators, and outcomes (PICO)                                                                      | Yes    | 171-193 |                                                              |
| <b>METHODS</b>                    |         |                                                                                                                                                                                                                               |        |         |                                                              |
| Eligibility criteria              | 8       | Specify the study characteristics (such as PICO, study design, setting, time frame) and report characteristics (such as years considered, language, publication status) to be used as criteria for eligibility for the review | Yes    | 139-153 |                                                              |
| Information                       | 9       | Describe all intended information sources (such as electronic databases, contact with study authors,                                                                                                                          | Yes    | 157-167 |                                                              |

|                                    |     |                                                                                                                                                                                                                                                           |      |                                  |
|------------------------------------|-----|-----------------------------------------------------------------------------------------------------------------------------------------------------------------------------------------------------------------------------------------------------------|------|----------------------------------|
| sources                            |     | trial registers or other grey literature sources) with planned dates of coverage                                                                                                                                                                          |      | 183-185                          |
| Search strategy                    | 10  | Present draft of search strategy to be used for at least one electronic database, including planned limits, such that it could be repeated                                                                                                                | Yes  | 171-193 Supplementary material 3 |
| Study records:                     |     |                                                                                                                                                                                                                                                           |      |                                  |
| Data management                    | 11a | Describe the mechanism(s) that will be used to manage records and data throughout the review                                                                                                                                                              | Yes  | 197-218                          |
| Selection process                  | 11b | State the process that will be used for selecting studies (such as two independent reviewers) through each phase of the review (that is, screening, eligibility and inclusion in meta-analysis)                                                           | Yes  | 197-218                          |
| Data collection process            | 11c | Describe planned method of extracting data from reports (such as piloting forms, done independently, in duplicate), any processes for obtaining and confirming data from investigators                                                                    | Yes  | 205-231                          |
| Data items                         | 12  | List and define all variables for which data will be sought (such as PICO items, funding sources), any pre-planned data assumptions and simplifications                                                                                                   | Yes  | 197-218                          |
| Outcomes and prioritization        | 13  | List and define all outcomes for which data will be sought, including prioritization of main and additional outcomes, with rationale                                                                                                                      | Yes  | 207-208 Supplementary material 4 |
| Risk of bias in individual studies | 14  | Describe anticipated methods for assessing risk of bias of individual studies, including whether this will be done at the outcome or study level, or both; state how this information will be used in data synthesis                                      | N.A. | Not applicable                   |
| Data synthesis                     | 15a | Describe criteria under which study data will be quantitatively synthesised                                                                                                                                                                               | Yes  | 213-218                          |
|                                    | 15b | If data are appropriate for quantitative synthesis, describe planned summary measures, methods of handling data and methods of combining data from studies, including any planned exploration of consistency (such as I <sup>2</sup> , Kendall's $\tau$ ) | N.A. | Not applicable                   |
|                                    | 15c | Describe any proposed additional analyses (such as sensitivity or subgroup analyses, meta-regression)                                                                                                                                                     | N.A. | Not applicable                   |
|                                    | 15d | If quantitative synthesis is not appropriate, describe the type of summary planned                                                                                                                                                                        | N.A. |                                  |
| Meta-bias(es)                      | 16  | Specify any planned assessment of meta-bias(es) (such as publication bias across studies, selective reporting within studies)                                                                                                                             | N.A. | Not applicable                   |
| Confidence in cumulative evidence  | 17  | Describe how the strength of the body of evidence will be assessed (such as GRADE)                                                                                                                                                                        | Yes  | 223-236 Supplementary material 5 |

**\* It is strongly recommended that this checklist be read in conjunction with the PRISMA-P Explanation and Elaboration (cite when available) for important clarification on the items. Amendments to a review protocol should be tracked and dated. The copyright for PRISMA-P (including checklist) is held by the PRISMA-P Group and is distributed under a Creative Commons Attribution Licence 4.0.**

*From: Shamseer L, Moher D, Clarke M, Ghersi D, Liberati A, Petticrew M, Shekelle P, Stewart L, PRISMA-P Group. Preferred reporting items for systematic review and meta-analysis protocols (PRISMA-P) 2015: elaboration and explanation. BMJ. 2015 Jan 2;349(jan02 1):g7647.*



## Supplementary material 3 – Database search strategy

### PubMed

**Date of the search:** 10-01-2022

**Database limit:** results will be limited from January 2000 to January 2022.

| # | Search strategy                                                                                                                                                                                                                                                                                                                                                                                                                                                                                                                                                                                                                                                                                                                      | Results |
|---|--------------------------------------------------------------------------------------------------------------------------------------------------------------------------------------------------------------------------------------------------------------------------------------------------------------------------------------------------------------------------------------------------------------------------------------------------------------------------------------------------------------------------------------------------------------------------------------------------------------------------------------------------------------------------------------------------------------------------------------|---------|
| 1 | "Primary Health Care"[Mesh:NoExp] OR Primary Care[TIAB] OR Primary Healthcare[TIAB] OR Primary Health Care[TIAB] OR "Physicians, Family"[Mesh] OR Family Physician*[TIAB] OR Family Practi*[TIAB] OR "General Practitioners"[Mesh] OR "General Practice"[Mesh] OR General Practi*[TIAB]                                                                                                                                                                                                                                                                                                                                                                                                                                              |         |
| 2 | "Health Services Needs and Demand"[Mesh] OR "Health Services Accessibility"[Mesh:NoExp] OR "Delivery of Health Care"[Mesh:NoExp] OR "Health Care Reform"[Mesh] OR "Health Policy"[Mesh:NoExp] OR "Appointments and Schedules"[Mesh:NoExp] OR OR "Mass Screening/organization and administration"[Mesh:NoExp] OR Outcome and Process Assessment, Health Care[Mesh] OR Quality Indicators, Health Care[Mesh:NoExp] OR Waiting Lists[Mesh] OR Health Polic*[TIAB] OR Healthcare Polic*[TIAB] OR National Polic*[TIAB] OR Healthcare Delivery[TIAB] OR delivery of care[TIAB] OR Health access*[TIAB] OR Healthcare access*[TIAB] OR Health Care Reform*[TIAB] OR primary care demand[TIAB] OR Health demand[TIAB] OR care demande[TIAB] |         |
| 3 | "Quebec"[Mesh] OR Quebec[TIAB]                                                                                                                                                                                                                                                                                                                                                                                                                                                                                                                                                                                                                                                                                                       |         |
| 4 | #1 AND #2 AND #3                                                                                                                                                                                                                                                                                                                                                                                                                                                                                                                                                                                                                                                                                                                     |         |
| 5 | #4 AND 2000/01/01:2022/01/01[dp]                                                                                                                                                                                                                                                                                                                                                                                                                                                                                                                                                                                                                                                                                                     |         |

## Supplementary Material 4 – Data extraction form

| Information used in data extraction | Description                                                                                                         |
|-------------------------------------|---------------------------------------------------------------------------------------------------------------------|
| Study reference                     | Identification of the study (e.g. Smith, 2018)                                                                      |
| Project related to the study        | If the study is related to a specific project (e.g. a trial or some other public or private interventions)          |
| Authors                             | List of authors of the study                                                                                        |
| Country                             | Country where the study was issued                                                                                  |
| Year                                | Year of publication of the study                                                                                    |
| Study design                        | Type of the study design                                                                                            |
| Service type                        | Service type related to primary care                                                                                |
| Participant characteristics         | Information related to patient characteristics (e.g. age, disease, sex, and other useful information of the cohort) |
| Performance measures                | Information related to the performance measures of the activity                                                     |
| Accessibility                       | Information related to the service accessibility for patients                                                       |
| Equity                              | Information related to the access service equity for patients                                                       |
| Health outcomes                     | Types and description of the health outcomes included in the study                                                  |
| Costs                               | Types and description of the health costs (direct and indirect) included in the study                               |
| Clinical area of interest           | Clinical area of interest (e.g. Respiratory, Cardiovascular)                                                        |
| GP role                             | The role of the GP in the study                                                                                     |
| GP activities                       | The activities of the GP in the study                                                                               |
| GP Organisation                     | Type of organisation within the GP works (e.g. Group of GPs)                                                        |

# Supplementary Material 5 - Mixed Methods Appraisal Tool (MMAT), version 2018

| Category of study designs                                                                                                               | Methodological quality criteria                                                                                         | Responses |    |            |          |
|-----------------------------------------------------------------------------------------------------------------------------------------|-------------------------------------------------------------------------------------------------------------------------|-----------|----|------------|----------|
|                                                                                                                                         |                                                                                                                         | Yes       | No | Can't tell | Comments |
| Screening questions (for all types)                                                                                                     | S1. Are there clear research questions?                                                                                 |           |    |            |          |
|                                                                                                                                         | S2. Do the collected data allow to address the research questions?                                                      |           |    |            |          |
| <i>Further appraisal may not be feasible or appropriate when the answer is 'No' or 'Can't tell' to one or both screening questions.</i> |                                                                                                                         |           |    |            |          |
| 1. Qualitative                                                                                                                          | 1.1. Is the qualitative approach appropriate to answer the research question?                                           |           |    |            |          |
|                                                                                                                                         | 1.2. Are the qualitative data collection methods adequate to address the research question?                             |           |    |            |          |
|                                                                                                                                         | 1.3. Are the findings adequately derived from the data?                                                                 |           |    |            |          |
|                                                                                                                                         | 1.4. Is the interpretation of results sufficiently substantiated by data?                                               |           |    |            |          |
|                                                                                                                                         | 1.5. Is there coherence between qualitative data sources, collection, analysis and interpretation?                      |           |    |            |          |
| 2. Quantitative randomized controlled trials                                                                                            | 2.1. Is randomization appropriately performed?                                                                          |           |    |            |          |
|                                                                                                                                         | 2.2. Are the groups comparable at baseline?                                                                             |           |    |            |          |
|                                                                                                                                         | 2.3. Are there complete outcome data?                                                                                   |           |    |            |          |
|                                                                                                                                         | 2.4. Are outcome assessors blinded to the intervention provided?                                                        |           |    |            |          |
|                                                                                                                                         | 2.5. Did the participants adhere to the assigned intervention?                                                          |           |    |            |          |
| 3. Quantitative non-randomized                                                                                                          | 3.1. Are the participants representative of the target population?                                                      |           |    |            |          |
|                                                                                                                                         | 3.2. Are measurements appropriate regarding both the outcome and intervention (or exposure)?                            |           |    |            |          |
|                                                                                                                                         | 3.3. Are there complete outcome data?                                                                                   |           |    |            |          |
|                                                                                                                                         | 3.4. Are the confounders accounted for in the design and analysis?                                                      |           |    |            |          |
|                                                                                                                                         | 3.5. During the study period, is the intervention administered (or exposure occurred) as intended?                      |           |    |            |          |
| 4. Quantitative Descriptive                                                                                                             | 4.1. Is the sampling strategy relevant to address the research question?                                                |           |    |            |          |
|                                                                                                                                         | 4.2. Is the sample representative of the target population?                                                             |           |    |            |          |
|                                                                                                                                         | 4.3. Are the measurements appropriate?                                                                                  |           |    |            |          |
|                                                                                                                                         | 4.4. Is the risk of nonresponse bias low?                                                                               |           |    |            |          |
|                                                                                                                                         | 4.5. Is the statistical analysis appropriate to answer the research question?                                           |           |    |            |          |
| 5. Mixed methods                                                                                                                        | 5.1. Is there an adequate rationale for using a mixed methods design to address the research question?                  |           |    |            |          |
|                                                                                                                                         | 5.2. Are the different components of the study effectively integrated to answer the research question?                  |           |    |            |          |
|                                                                                                                                         | 5.3. Are the outputs of the integration of qualitative and quantitative components adequately interpreted?              |           |    |            |          |
|                                                                                                                                         | 5.4. Are divergences and inconsistencies between quantitative and qualitative results adequately addressed?             |           |    |            |          |
|                                                                                                                                         | 5.5. Do the different components of the study adhere to the quality criteria of each tradition of the methods involved? |           |    |            |          |

Hong, Q. N., Gonzalez-Reyes, A., & Pluye, P. (2018). Improving the usefulness of a tool for appraising the quality of qualitative, quantitative and mixed methods studies, the Mixed Methods Appraisal Tool (MMAT). *Journal of Evaluation in Clinical Practice*, 24(3), 459-467.

Hong, Q. N., & Pluye, P. (2018). A conceptual framework for critical appraisal in systematic mixed studies reviews. *Journal of Mixed Methods Research*, Advance online publication, <https://doi.org/10.1177/1558689818770058>
