# Supplementary material for: Impact of primary health care reforms in Quebec Health Care System: a systematic literature review protocol
Source: PubMed Central journal article supplement — BMJ Open. 2023 Jul 31;13(7):e068666. doi: 10.1136/bmjopen-2022-068666 (PMC10391782; doi:10.1136/bmjopen-2022-068666), 2023-07-31
Supplement: bmjopen-2022-068666supp001.pdf [file bmjopen-2022-068666supp001.pdf]

## Supplementary material 1 - Distribution of GPs by administrative region in Quebec province

| Administrative region            | GPs or Family doctors <sup>1</sup> | Inhabitants (year 2022) <sup>2</sup> | GP each 1000 inhabitants |
|----------------------------------|------------------------------------|--------------------------------------|--------------------------|
| 01 Bas-Saint-Laurent             | 287                                | 200,507                              | 1.431                    |
| 02 Saguenay-Lac-St-Jean          | 388                                | 282,330                              | 1.374                    |
| 03 Québec                        | 1,084                              | 771,611                              | 1.405                    |
| 04 Mauricie                      | 350                                | 281,163                              | 1.245                    |
| 05 Estrie                        | 409                                | 507,208                              | 0.806                    |
| 06 Montréal                      | 2,649                              | 2,038,845                            | 1.299                    |
| 07 Outaouais                     | 445                                | 408,979                              | 1.088                    |
| 08 Abitibi-Témiscamingue         | 200                                | 148,493                              | 1.347                    |
| 09 Côte-Nord                     | 154                                | 90,405                               | 1.703                    |
| 10 Nord du Québec                | 152                                | 46,916                               | 3.240                    |
| 11 Gaspésie-Îles-de-la-Madeleine | 196                                | 92,403                               | 2.121                    |
| 12 Chaudière-Appalaches          | 443                                | 444,072                              | 0.998                    |
| 13 Laval                         | 462                                | 446,476                              | 1.035                    |
| 14 Lanaudière                    | 500                                | 544,265                              | 0.919                    |
| 15 Laurentides                   | 671                                | 657,375                              | 1.021                    |
| 16 Montérégie                    | 1,644                              | 1,475,578                            | 1.114                    |
| 17 Centre-du-Québec              | 244                                | 259,033                              | 0.942                    |
| <b>Total</b>                     | <b>10,278</b>                      | <b>8,695,659</b>                     | <b>1.182</b>             |

Sources :

<sup>1</sup> Collège des médecins du Québec - Répartition des médecins selon la région administrative - <http://www.cmq.org/statistiques/region.aspx> - last access April 27th, 2023

<sup>2</sup> Institut de la statistique du Québec - Principaux indicateurs sur le Québec et ses régions (<https://statistique.quebec.ca/fr/vitrine/region>)- last access April 15th, 2023
