# Supplementary material for: Impact of primary health care reforms in Quebec Health Care System: a systematic literature review protocol
Source: PubMed Central journal article supplement — BMJ Open. 2023 Jul 31;13(7):e068666. doi: 10.1136/bmjopen-2022-068666 (PMC10391782; doi:10.1136/bmjopen-2022-068666), 2023-07-31
Supplement: bmjopen-2022-068666supp003.pdf [file bmjopen-2022-068666supp003.pdf]

## Supplementary material 3 – Database search strategy

### PubMed

**Date of the search:** 10-01-2022

**Database limit:** results will be limited from January 2000 to January 2022.

| # | Search strategy                                                                                                                                                                                                                                                                                                                                                                                                                                                                                                                                                                                                                                                                                                                      | Results |
|---|--------------------------------------------------------------------------------------------------------------------------------------------------------------------------------------------------------------------------------------------------------------------------------------------------------------------------------------------------------------------------------------------------------------------------------------------------------------------------------------------------------------------------------------------------------------------------------------------------------------------------------------------------------------------------------------------------------------------------------------|---------|
| 1 | "Primary Health Care"[Mesh:NoExp] OR Primary Care[TIAB] OR Primary Healthcare[TIAB] OR Primary Health Care[TIAB] OR "Physicians, Family"[Mesh] OR Family Physician*[TIAB] OR Family Practi*[TIAB] OR "General Practitioners"[Mesh] OR "General Practice"[Mesh] OR General Practi*[TIAB]                                                                                                                                                                                                                                                                                                                                                                                                                                              |         |
| 2 | "Health Services Needs and Demand"[Mesh] OR "Health Services Accessibility"[Mesh:NoExp] OR "Delivery of Health Care"[Mesh:NoExp] OR "Health Care Reform"[Mesh] OR "Health Policy"[Mesh:NoExp] OR "Appointments and Schedules"[Mesh:NoExp] OR OR "Mass Screening/organization and administration"[Mesh:NoExp] OR Outcome and Process Assessment, Health Care[Mesh] OR Quality Indicators, Health Care[Mesh:NoExp] OR Waiting Lists[Mesh] OR Health Polic*[TIAB] OR Healthcare Polic*[TIAB] OR National Polic*[TIAB] OR Healthcare Delivery[TIAB] OR delivery of care[TIAB] OR Health access*[TIAB] OR Healthcare access*[TIAB] OR Health Care Reform*[TIAB] OR primary care demand[TIAB] OR Health demand[TIAB] OR care demande[TIAB] |         |
| 3 | "Quebec"[Mesh] OR Quebec[TIAB]                                                                                                                                                                                                                                                                                                                                                                                                                                                                                                                                                                                                                                                                                                       |         |
| 4 | #1 AND #2 AND #3                                                                                                                                                                                                                                                                                                                                                                                                                                                                                                                                                                                                                                                                                                                     |         |
| 5 | #4 AND 2000/01/01:2022/01/01[dp]                                                                                                                                                                                                                                                                                                                                                                                                                                                                                                                                                                                                                                                                                                     |         |
