# Supplementary material for: Impact of primary health care reforms in Quebec Health Care System: a systematic literature review protocol
Source: PubMed Central journal article supplement — BMJ Open. 2023 Jul 31;13(7):e068666. doi: 10.1136/bmjopen-2022-068666 (PMC10391782; doi:10.1136/bmjopen-2022-068666), 2023-07-31
Supplement: bmjopen-2022-068666supp004.pdf [file bmjopen-2022-068666supp004.pdf]

## Supplementary Material 4 – Data extraction form

| Information used in data extraction | Description                                                                                                         |
|-------------------------------------|---------------------------------------------------------------------------------------------------------------------|
| Study reference                     | Identification of the study (e.g. Smith, 2018)                                                                      |
| Project related to the study        | If the study is related to a specific project (e.g. a trial or some other public or private interventions)          |
| Authors                             | List of authors of the study                                                                                        |
| Country                             | Country where the study was issued                                                                                  |
| Year                                | Year of publication of the study                                                                                    |
| Study design                        | Type of the study design                                                                                            |
| Service type                        | Service type related to primary care                                                                                |
| Participant characteristics         | Information related to patient characteristics (e.g. age, disease, sex, and other useful information of the cohort) |
| Performance measures                | Information related to the performance measures of the activity                                                     |
| Accessibility                       | Information related to the service accessibility for patients                                                       |
| Equity                              | Information related to the access service equity for patients                                                       |
| Health outcomes                     | Types and description of the health outcomes included in the study                                                  |
| Costs                               | Types and description of the health costs (direct and indirect) included in the study                               |
| Clinical area of interest           | Clinical area of interest (e.g. Respiratory, Cardiovascular)                                                        |
| GP role                             | The role of the GP in the study                                                                                     |
| GP activities                       | The activities of the GP in the study                                                                               |
| GP Organisation                     | Type of organisation within the GP works (e.g. Group of GPs)                                                        |
